# Supplementary material for: Metabolomic changes in crown of alfalfa (Medicago sativa L.) during de-acclimation
Source: Sci Rep. 2022 Sep 2;12:14977. doi: 10.1038/s41598-022-19388-x (PMC9440230; doi:10.1038/s41598-022-19388-x)
Supplement: Supplementary file 5 — Supplementary Information 5. [file 41598_2022_19388_MOESM5_ESM.xlsx]

## Sheet: ZD_1 vs WL440_1 up-regulated
Metabolite	Formula	FC(ZD1/WL440_1)	P_value	ZD1_1	ZD1_2	ZD1_3	ZD1_4	ZD1_5	ZD1_6	WL440_1_1	WL440_1_2	WL440_1_3	WL440_1_4	WL440_1_5	WL440_1_6	HMDB Subclass	subclass	HMDB Superclass
Egonol glucoside	C25H28O10	1.0905	9.326e-14	5.5301	5.5021	5.5147	5.5113	5.4993	5.4869	5.0667	5.0514	5.029	5.0393	5.0562	5.0593	2-arylbenzofuran flavonoids	Not Available	Phenylpropanoids and polyketides
Goshonoside F1	C26H44O8	1.1011	7.339e-13	5.8377	5.7779	5.805	5.7862	5.7619	5.796	5.2871	5.2632	5.2564	5.262	5.252	5.2538	Prenol lipids	Terpene glycosides	Lipids and lipid-like molecules
CMPF	C12H16O5	1.11581	7.012e-17	4.8317	4.8273	4.8296	4.818	4.8277	4.8262	4.333	4.3168	4.3353	4.3114	4.3285	4.3319	-	-	-
Precarthamin	C21H24O11	1.11665	4.341e-17	5.5257	5.5176	5.5125	5.5168	5.5045	5.5097	4.9424	4.9511	4.9251	4.9292	4.9384	4.9396	Flavonoids	Flavonoid glycosides	Phenylpropanoids and polyketides
Gypsogenin 3-O-b-D-glucuronide	C36H54O10	1.15918	7.312e-08	4.5124	4.5293	4.4739	4.5492	4.5479	4.4749	3.8754	3.761	4.0081	3.994	3.7912	3.9419	Prenol lipids	Terpene glycosides	Lipids and lipid-like molecules
Ginsenoside Rh7	C36H60O9	1.11472	6.123e-11	5.0788	5.0909	5.066	5.096	5.0938	5.0655	4.6079	4.4815	4.5645	4.5488	4.5738	4.5752	Prenol lipids	Triterpenoids	Lipids and lipid-like molecules
L-alpha-Aspartyl-L-hydroxyproline	C9H14N2O6	1.14684	4.756e-14	5.1613	5.1417	5.1615	5.1448	5.1513	5.1233	4.5274	4.4992	4.4701	4.4906	4.4728	4.4658	Carboxylic acids and derivatives	Amino acids, peptides, and analogues	Organic acids and derivatives
Feruloyl C1-glucuronide	C16H18O10	1.26041	6.393e-17	4.8976	4.8875	4.9174	4.9041	4.8866	4.9224	3.8952	3.8719	3.8901	3.9019	3.87	3.9083	Isoflavonoids	Isoflavonoid O-glycosides	Phenylpropanoids and polyketides
Araliasaponin II	C47H76O19	1.1835	8.775e-11	5.5791	5.5674	5.5435	5.5987	5.5532	5.5565	4.7684	4.6691	4.6266	4.7842	4.6184	4.7498	Prenol lipids	Terpene glycosides	Lipids and lipid-like molecules
Flavidulol C	C34H42O4	1.08866	1.857e-14	6.1478	6.1641	6.1473	6.1485	6.1618	6.144	5.6382	5.6615	5.633	5.652	5.6781	5.6407	Phenol ethers	Anisoles	Benzenoids
(ent-15beta)-15-Hydroxy-19-trachylobanoic acid	C20H30O3	1.11146	7.646e-12	4.7081	4.6275	4.6545	4.6796	4.6715	4.6624	4.2226	4.1791	4.1761	4.2043	4.2058	4.2081	Prenol lipids	Diterpenoids	Lipids and lipid-like molecules
Cysteinyl-Hydroxyproline	C8H14N2O4S	1.10019	4.499e-15	5.2657	5.2835	5.27	5.2716	5.2697	5.2664	4.8002	4.7922	4.7793	4.8138	4.7752	4.7846	Carboxylic acids and derivatives	Amino acids, peptides, and analogues	Organic acids and derivatives
Medicanine	C7H13NO3	1.16995	2.649e-16	5.8102	5.8175	5.8278	5.808	5.8261	5.8145	4.9534	4.9737	4.957	4.9663	5.0071	4.9749	Carboxylic acids and derivatives	Amino acids, peptides, and analogues	Organic acids and derivatives
Glutaminylproline	C10H17N3O4	1.10927	1.816e-13	5.6924	5.6717	5.7207	5.7124	5.7132	5.7181	5.1332	5.1607	5.1188	5.1668	5.1292	5.1464	Carboxylic acids and derivatives	Amino acids, peptides, and analogues	Organic acids and derivatives
3'-Amino-3'-deoxythimidine	C10H15N3O4	1.12385	1.183e-13	4.77	4.757	4.7988	4.7806	4.801	4.7832	4.2752	4.2348	4.2494	4.2687	4.2375	4.2657	Pyrimidine nucleosides	Pyrimidine 2',3'-dideoxyribonucleosides	Nucleosides, nucleotides, and analogues
Benzofuran	C8H6O	1.1889	3.285e-18	4.6103	4.6001	4.6065	4.6087	4.6113	4.6076	3.894	3.8711	3.8708	3.8827	3.8695	3.8642	Benzofurans	Not Available	Organoheterocyclic compounds
Maslinic acid 3-O-b-D-glucoside	C36H58O9	1.09096	5.168e-17	5.7592	5.7366	5.7494	5.7327	5.7448	5.7447	5.2695	5.2591	5.2676	5.2646	5.2669	5.2657	Prenol lipids	Terpene glycosides	Lipids and lipid-like molecules
Xanthoxylin	C10H12O4	1.17026	7.774e-13	4.443	4.4169	4.4785	4.4656	4.4542	4.4219	3.7772	3.7833	3.7764	3.8408	3.8176	3.8061	Organooxygen compounds	Carbonyl compounds	Organic oxygen compounds
Tanacetol A	C17H26O4	1.13996	0.0006273	4.3543	4.2631	4.1775	4.1039	3.9759	3.7058	3.5345	3.7496	3.6133	3.4736	3.6506	3.5415	Prenol lipids	Sesquiterpenoids	Lipids and lipid-like molecules
Pimecrolimus	C43H68ClNO11	1.18114	2.436e-12	5.8971	5.9225	5.9144	5.8938	5.8804	5.896	4.9115	5.0726	4.9719	4.9948	5.0044	5.0229	Macrolide lactams	Not Available	Phenylpropanoids and polyketides
PS(16:1(9Z)/20:1(11Z))	C42H78NO10P	1.09592	3.027e-07	5.3322	5.3366	5.3015	5.4386	5.406	5.4034	5.0344	4.8931	4.8804	4.8033	4.9384	4.8482	Glycerophospholipids	Glycerophosphoserines	Lipids and lipid-like molecules
CPA(18:1(11Z)/0:0)	C21H39O6P	1.13002	0.003171	4.9804	5.0097	5.098	5.0101	4.9863	4.9515	4.7459	4.7678	3.8903	4.1065	4.4251	4.645	Glycerophospholipids	Glycerophosphates	Lipids and lipid-like molecules
PC-M6	C27H35NO3	1.12336	0.0008766	5.0766	5.0415	5.1071	5.1485	5.2613	5.1293	4.7407	4.6933	4.6466	4.012	4.5111	4.7777	Naphthopyrans	Not Available	Organoheterocyclic compounds
1-O-beta-D-Glucopyranosyl-2,3-di-O-palmitoylglycerol	C41H78O10	1.31516	1.512e-11	5.124	4.9758	5.2132	5.0204	5.0976	5.1167	3.8547	3.8444	3.8923	3.8498	3.9313	3.8509	Glycerolipids	Glycosylglycerols	Lipids and lipid-like molecules
Squamotacin	C37H66O7	1.28715	6.445e-09	5.0298	5.0814	4.9445	4.9285	5.0038	5.0521	3.7493	4.0615	4.0677	3.8205	3.7771	3.8645	Fatty Acyls	Fatty alcohols	Lipids and lipid-like molecules
PG(12:0/16:0)	C34H67O10P	1.10635	5.644e-12	5.9802	5.9861	5.9849	6.0018	5.993	6.0066	5.3915	5.4102	5.3919	5.3953	5.4884	5.4213	-	-	-
Quasiprotopanaxatriol	C30H50O3	1.09309	5.373e-11	5.4727	5.5016	5.4637	5.4437	5.435	5.4441	4.9979	5.001	5.0406	4.9451	4.9918	4.9944	Prenol lipids	Triterpenoids	Lipids and lipid-like molecules
Diplosporin	C12H16O4	1.1508	1.93e-09	4.6712	4.6943	4.591	4.6994	4.7247	4.6865	4.0999	3.9822	4.0967	4.0517	4.0205	4.1406	Pyrans	Pyranones and derivatives	Organoheterocyclic compounds
16-Oxolycoclavanol	C30H48O4	1.11309	2.958e-09	4.8594	4.792	4.8077	4.8585	4.8033	4.8181	4.2856	4.3678	4.3929	4.3404	4.2495	4.3637	-	-	-
(1R)-Glutathionyl-(2R)-hydroxy-1,2-dihydronaphthalene	C20H25N3O7S	1.12639	1.923e-14	4.7788	4.7776	4.7873	4.782	4.7781	4.7571	4.2529	4.2207	4.2234	4.2572	4.2595	4.2334	Carboxylic acids and derivatives	Amino acids, peptides, and analogues	Organic acids and derivatives
Oroselone	C14H10O3	1.11503	2.157e-15	4.8699	4.8648	4.861	4.8803	4.8669	4.8517	4.3706	4.3828	4.363	4.3569	4.3479	4.3615	Coumarins and derivatives	Furanocoumarins	Phenylpropanoids and polyketides
P-Hydroxybenzophenone	C13H10O2	1.12077	2.288e-12	4.3291	4.3501	4.3459	4.3247	4.3189	4.3337	3.8411	3.8727	3.8395	3.8775	3.9088	3.8609	-	-	-
Simmondsin 2'-ferulate	C26H33NO12	1.26959	1.009e-10	4.7791	4.7972	4.85	4.8232	4.8344	4.7938	3.7821	3.6834	3.7847	3.7252	3.9313	3.8421	Cinnamic acids and derivatives	Hydroxycinnamic acids and derivatives	Phenylpropanoids and polyketides
N2-Acetyl-L-aminoadipate	C8H13NO5	1.08955	2.336e-15	5.9122	5.9144	5.9261	5.9062	5.9022	5.9162	5.4494	5.4342	5.4171	5.4252	5.42	5.4191	-	-	-

## Sheet: ZD_1 vs WL440_1 down-regulated
Metabolite	Formula	FC(ZD1/WL440_1)	P_value	ZD1_1	ZD1_2	ZD1_3	ZD1_4	ZD1_5	ZD1_6	WL440_1_1	WL440_1_2	WL440_1_3	WL440_1_4	WL440_1_5	WL440_1_6	HMDB Subclass	subclass	HMDB Superclass
Gamma-Glutamylvaline	C10H18N2O5	0.855467	1.77e-18	4.7442	4.7257	4.7512	4.7401	4.7441	4.7403	5.5311	5.5395	5.5482	5.5496	5.5492	5.5327	Carboxylic acids and derivatives	Amino acids, peptides, and analogues	Organic acids and derivatives
N2-(3-Hydroxysuccinoyl)arginine	C10H18N4O6	0.893783	4.293e-12	4.6725	4.6578	4.7096	4.6839	4.6728	4.7259	5.1988	5.2543	5.2522	5.2724	5.2319	5.2559	Carboxylic acids and derivatives	Amino acids, peptides, and analogues	Organic acids and derivatives
Stachyose	C24H42O21	0.794922	8.93e-10	4.4438	4.492	4.5588	4.5408	4.431	4.2097	5.5914	5.6046	5.5618	5.6306	5.5888	5.5824	Organooxygen compounds	Carbohydrates and carbohydrate conjugates	Organic oxygen compounds
(Z)-6-Tetradecene-1,3-diyne-5,8-diol	C14H20O2	0.72863	4.563e-18	3.7067	3.7314	3.7004	3.7318	3.7006	3.6748	5.0847	5.0829	5.0988	5.0897	5.0831	5.0973	Fatty Acyls	Fatty alcohols	Lipids and lipid-like molecules
1-(sn-Glycero-3-phospho)-1D-myo-inositol	C9H19O11P	0.897617	4.259e-16	5.3394	5.3562	5.3631	5.3592	5.3319	5.3359	5.9673	5.9571	5.9462	5.9668	5.9597	5.951	Glycerophospholipids	Glycerophosphoinositols	Lipids and lipid-like molecules
Pseudooxynicotine	C10H14N2O	0.839898	7.054e-18	3.9667	3.9673	3.9819	3.9569	3.956	3.9681	4.7309	4.7147	4.7332	4.7242	4.7149	4.7127	Organooxygen compounds	Carbonyl compounds	Organic oxygen compounds
Geniposidic Acid	C16H22O10	0.872201	1.313e-12	3.7753	3.7643	3.7176	3.7363	3.7085	3.7377	4.267	4.3018	4.2964	4.3038	4.2621	4.2957	Prenol lipids	Terpene glycosides	Lipids and lipid-like molecules
Linalool oxide D 3-[apiosyl-(1->6)-glucoside]	C21H36O11	0.781843	4.51e-17	4.071	4.0313	4.0458	4.0017	4.0469	4.0353	5.1663	5.1646	5.1618	5.1672	5.1753	5.1626	Organooxygen compounds	Carbohydrates and carbohydrate conjugates	Organic oxygen compounds
6-Gingesulfonic acid	C17H26O6S	0.848157	1.075e-14	3.8441	3.8382	3.8774	3.8209	3.8544	3.8222	4.5238	4.5214	4.5254	4.5241	4.5417	4.5519	Phenols	Methoxyphenols	Benzenoids
Bersimoside I	C60H98O28	0.922053	8.475e-15	5.1854	5.1848	5.2097	5.1824	5.187	5.2088	5.6345	5.6392	5.624	5.6415	5.6334	5.6193	Prenol lipids	Terpene glycosides	Lipids and lipid-like molecules
Emodin	C15H10O5	0.815267	1.081e-16	3.4098	3.3964	3.4108	3.4153	3.3835	3.4268	4.1697	4.1848	4.1791	4.169	4.191	4.1812	Anthracenes	Anthraquinones	Benzenoids
Undecanoic acid	C11H22O2	0.825533	2.735e-11	2.8187	2.7439	2.8442	2.7723	2.7994	2.7452	3.353	3.4072	3.3859	3.3488	3.3877	3.3754	Fatty Acyls	Fatty acids and conjugates	Lipids and lipid-like molecules
Gamma-CEHC	C15H20O4	0.867336	2.064e-12	3.9118	3.9386	3.889	3.8486	3.8746	3.8753	4.5	4.4633	4.4705	4.476	4.5041	4.4979	Benzopyrans	1-benzopyrans	Organoheterocyclic compounds
24alpha-Methyllophenol	C29H50O	0.919378	9.518e-17	5.0847	5.0767	5.086	5.0883	5.0822	5.0994	5.5261	5.5415	5.5308	5.5312	5.5251	5.5375	Steroids and steroid derivatives	Ergostane steroids	Lipids and lipid-like molecules
(3b,4b,11b,14b)-11-Ethoxy-3,4-epoxy-14-hydroxy-12-cyathen-15-al 14-xyloside	C27H42O8	0.527101	1.028e-24	2.6135	2.6101	2.6176	2.615	2.6184	2.621	4.9707	4.9514	4.9605	4.9665	4.9597	4.97	Prenol lipids	Diterpenoids	Lipids and lipid-like molecules
Aflatoxin B2a	C17H14O7	0.853823	1.605e-16	4.5518	4.5575	4.5716	4.5464	4.5617	4.5468	5.3265	5.3288	5.3353	5.3195	5.362	5.3468	Coumarins and derivatives	Furanocoumarins	Phenylpropanoids and polyketides
Fonsecin B	C16H16O6	0.806431	2.315e-12	3.7502	3.7677	3.7406	3.7986	3.7205	3.6425	4.624	4.6314	4.624	4.6299	4.662	4.6333	Naphthopyrans	Naphthopyranones	Organoheterocyclic compounds
4-Hydroxy-8-methoxy-2H-furo[2,3-h]-1-benzopyran-2-one	C12H8O5	0.754474	5.201e-12	2.9268	2.9346	2.8088	2.8663	2.7845	2.8784	3.7856	3.7951	3.8079	3.7871	3.8068	3.8183	Coumarins and derivatives	Furanocoumarins	Phenylpropanoids and polyketides
Carbadox	C11H10N4O4	0.845129	2.819e-15	4.0502	4.0655	4.0504	4.0315	4.0674	4.0952	4.8103	4.8008	4.818	4.8002	4.7954	4.7977	Diazanaphthalenes	Benzodiazines	Organoheterocyclic compounds
Talaromycin A	C12H22O4	0.900946	1.171e-20	5.2367	5.2337	5.2369	5.2393	5.2441	5.2414	5.8114	5.8106	5.8199	5.8151	5.8161	5.8182	Organooxygen compounds	Ethers	Organic oxygen compounds
1,3,5-Trihydroxy-6,7-dimethoxy-2-methylanthraquinone	C17H14O7	0.893349	4.881e-13	3.7456	3.7293	3.7724	3.7697	3.7647	3.7823	4.2291	4.2138	4.218	4.1951	4.1975	4.2045	Anthracenes	Anthraquinones	Benzenoids
Mecamylamine	C11H21N	0.605749	2.578e-10	2.5385	2.6752	2.6418	2.2184	2.5602	2.5393	4.1818	4.1657	4.1712	4.1821	4.1683	4.1816	Prenol lipids	Monoterpenoids	Lipids and lipid-like molecules
Canavalioside	C26H42O12	0.858984	5.299e-17	4.3924	4.4177	4.4031	4.3824	4.4023	4.3879	5.1187	5.1073	5.1182	5.1292	5.1292	5.1172	Prenol lipids	Terpene glycosides	Lipids and lipid-like molecules
Methyl (3x,10R)-dihydroxy-11-dodecene-6,8-diynoate 10-glucoside	C19H26O9	0.824096	9.095e-17	4.1237	4.0979	4.1061	4.0814	4.1173	4.0953	4.9707	4.9866	4.9944	4.9783	4.9621	4.9856	Fatty Acyls	Fatty acyl glycosides	Lipids and lipid-like molecules
7,8-Dihydrovomifoliol 9-[apiosyl-(1->6)-glucoside]	C24H40O12	0.661297	5.337e-11	3.2644	3.093	3.0657	3.1679	2.8851	2.9994	4.6806	4.6379	4.6457	4.6716	4.6537	4.6452	Fatty Acyls	Fatty acyl glycosides	Lipids and lipid-like molecules
Heptyl 4-hydroxybenzoate	C14H20O3	0.719062	6.022e-16	3.3239	3.3176	3.334	3.2697	3.3531	3.2728	4.608	4.6157	4.6112	4.5973	4.6104	4.5947	Benzene and substituted derivatives	Benzoic acids and derivatives	Benzenoids
15-Acetoxyscirpene-3,4-diol 4-O-a-D-glucopyranoside	C23H34O11	0.891334	9.278e-16	5.2467	5.2288	5.2399	5.2212	5.2042	5.2099	5.874	5.8628	5.8627	5.8564	5.8611	5.8561	Prenol lipids	Sesquiterpenoids	Lipids and lipid-like molecules
2-(2,6-dihydroxy-3,4-dimethoxycyclohexylidene)acetonitrile	C10H15NO4	0.889017	1.896e-13	3.8545	3.8641	3.8714	3.8475	3.8171	3.8628	4.3228	4.3237	4.3237	4.3396	4.35	4.3456	Organooxygen compounds	Alcohols and polyols	Organic oxygen compounds
Valyl-Valine	C10H20N2O3	0.848104	1.652e-18	4.255	4.2411	4.2578	4.2312	4.2548	4.2567	5.0079	5.0053	5.0129	5.0121	5.014	5.0098	Carboxylic acids and derivatives	Amino acids, peptides, and analogues	Organic acids and derivatives
2-HYDROXY-3,4-DIMETHOXYBENZOIC ACID	C9H10O5	0.896978	4.581e-13	3.7708	3.764	3.7561	3.7714	3.8077	3.7494	4.2081	4.2027	4.2192	4.2022	4.1975	4.1905	Benzene and substituted derivatives	Benzoic acids and derivatives	Benzenoids
N-Acetylmuramate	C11H19NO8	0.867612	8.147e-17	4.718	4.6993	4.7113	4.7057	4.7044	4.7355	5.4294	5.4321	5.4382	5.4376	5.4348	5.4142	Organooxygen compounds	Carbohydrates and carbohydrate conjugates	Organic oxygen compounds
Xanthine	C5H4N4O2	0.850827	4.649e-13	3.133	3.1147	3.1454	3.114	3.1362	3.1764	3.665	3.6855	3.7112	3.6964	3.695	3.6713	Imidazopyrimidines	Purines and purine derivatives	Organoheterocyclic compounds
Abscisic acid	C15H20O4	0.770248	2.28e-19	4.6216	4.5938	4.5855	4.6089	4.6115	4.5966	5.9855	5.9823	5.9875	5.9699	5.9669	5.9644	Prenol lipids	Sesquiterpenoids	Lipids and lipid-like molecules
Sarmentosin	C11H17NO7	0.902684	5.961e-16	5.2193	5.1991	5.2079	5.215	5.2246	5.2131	5.7765	5.788	5.7796	5.777	5.774	5.7519	Fatty Acyls	Fatty acyl glycosides	Lipids and lipid-like molecules
5-(3',4',5'-trihydroxyphenyl)-gamma-valerolactone-O-methyl-4'-O-glucuronide	C18H22O11	0.888666	1.51e-14	4.4252	4.4336	4.4158	4.4122	4.4374	4.4104	4.9978	4.9887	4.9817	4.9538	4.959	4.9769	Organooxygen compounds	Carbohydrates and carbohydrate conjugates	Organic oxygen compounds
Cynaroside A	C21H32O10	0.88696	1.735e-14	5.1028	5.1324	5.1286	5.1099	5.0771	5.0961	5.7524	5.7479	5.7634	5.7424	5.7711	5.7742	Prenol lipids	Terpene lactones	Lipids and lipid-like molecules
Annuolide C	C15H18O3	0.849061	1.02e-17	3.9784	3.9734	3.9636	3.9961	3.9767	3.9748	4.6908	4.6754	4.6898	4.69	4.6802	4.6789	Prenol lipids	Terpene lactones	Lipids and lipid-like molecules
Lucidone A	C24H34O5	0.743007	2.971e-14	3.676	3.6885	3.6507	3.7857	3.6749	3.6758	4.99	4.9465	4.9866	4.9682	4.9685	4.954	Prenol lipids	Sesquiterpenoids	Lipids and lipid-like molecules
L-Methionine	C5H11NO2S	0.808124	1.024e-14	3.2667	3.2467	3.2451	3.2559	3.2035	3.2374	4.024	4.0004	4.0365	4.0079	4.0168	3.9895	Carboxylic acids and derivatives	Amino acids, peptides, and analogues	Organic acids and derivatives
4'-Methylliquiritigenin 7-rhamnoside	C22H24O8	0.646277	1.209e-08	2.6375	2.1869	2.3577	2.1883	2.4489	2.1897	3.6287	3.5832	3.6717	3.6001	3.5955	3.5995	Flavonoids	Flavonoid glycosides	Phenylpropanoids and polyketides
Acoric acid	C15H24O4	0.788716	9.5e-13	3.5153	3.3911	3.4375	3.4596	3.418	3.4936	4.3657	4.3994	4.3436	4.4058	4.3719	4.3787	Prenol lipids	Monoterpenoids	Lipids and lipid-like molecules
3,4,5-trihydroxy-6-[(2-oxo-3-phenylpropanoyl)oxy]oxane-2-carboxylic acid	C15H16O9	0.84631	1.61e-14	3.7578	3.7693	3.7777	3.7193	3.7557	3.7886	4.4477	4.4491	4.447	4.4477	4.4273	4.4475	Organooxygen compounds	Carbohydrates and carbohydrate conjugates	Organic oxygen compounds
Lippioside II	C25H30O14	0.908116	7.61e-12	4.5039	4.4939	4.4587	4.5001	4.4607	4.5052	4.9742	4.9279	4.9504	4.9098	4.9313	4.954	Prenol lipids	Terpene glycosides	Lipids and lipid-like molecules
Hydroxydesmthyl doxepin glucuronide	C25H29NO8	0.293734	2.583e-26	1.5343	1.5308	1.5297	1.5321	1.5353	1.5335	5.2323	5.2191	5.2226	5.2055	5.2153	5.2169	Benzoxepines	Dibenzoxepines	Organoheterocyclic compounds
Carissanol	C20H24O7	0.871947	1.12e-07	4.0522	4.1941	4.1126	4.0809	4.1153	4.0794	4.7626	4.5092	4.7519	4.7118	4.7548	4.7644	Furanoid lignans	Tetrahydrofuran lignans	Lignans, neolignans and related compounds
Merodesmosine	C18H34N4O6	0.824887	6.356e-16	4.1883	4.2022	4.1619	4.1968	4.2013	4.1468	5.0784	5.0645	5.0752	5.0697	5.0728	5.0632	Carboxylic acids and derivatives	Amino acids, peptides, and analogues	Organic acids and derivatives
Threoninyl-Glutamine	C9H17N3O5	0.752524	5.385e-14	4.1272	4.1302	4.0988	4.13	4.1226	3.9866	5.451	5.4417	5.4443	5.4512	5.441	5.4534	Carboxylic acids and derivatives	Amino acids, peptides, and analogues	Organic acids and derivatives
(Z)-3-Oxo-2-(2-pentenyl)-1-cyclopenteneacetic acid	C12H16O3	0.883391	3.512e-13	4.3749	4.34	4.3892	4.3514	4.3653	4.3165	4.9446	4.9423	4.9085	4.9347	4.9247	4.9298	Organooxygen compounds	Carbonyl compounds	Organic oxygen compounds
3'-Hydroxystanozolol	C21H32N2O2	0.878354	0.0001149	4.6697	4.5848	4.4756	4.4284	3.983	4.3742	5.1009	5.055	5.03	4.9948	5.0613	4.9434	Steroids and steroid derivatives	Estrane steroids	Lipids and lipid-like molecules
Xanthotoxol arabinoside	C16H14O8	0.828158	2.433e-14	3.8951	3.8572	3.8599	3.9261	3.9002	3.9284	4.7017	4.7071	4.7033	4.6982	4.707	4.6938	Coumarins and derivatives	Coumarin glycosides	Phenylpropanoids and polyketides
Mollicellin A	C21H18O7	0.821763	5.865e-11	3.7365	3.7426	3.7322	3.7883	3.7565	3.9015	4.639	4.5971	4.5931	4.5976	4.5588	4.5868	Prenol lipids	Sesterterpenoids	Lipids and lipid-like molecules
Arginyl-Asparagine	C10H20N6O4	0.824689	2.246e-12	3.8608	3.8119	3.7996	3.9148	3.8919	3.8117	4.6877	4.6741	4.6558	4.6557	4.6686	4.6514	Carboxylic acids and derivatives	Amino acids, peptides, and analogues	Organic acids and derivatives
2-Amino-4-ethoxy-3-hydroxybutanoic acid	C6H13NO4	0.894162	2.119e-11	4.2809	4.2298	4.3045	4.2501	4.276	4.2069	4.7695	4.781	4.7563	4.7523	4.7428	4.7707	Carboxylic acids and derivatives	Amino acids, peptides, and analogues	Organic acids and derivatives
Jasmolone glucoside	C17H26O7	0.879583	3.678e-12	4.0742	4.0611	4.0439	4.032	4.1031	4.0096	4.6305	4.6174	4.6065	4.6097	4.5909	4.6005	Organooxygen compounds	Carbohydrates and carbohydrate conjugates	Organic oxygen compounds
Tetradecanedioic acid	C14H26O4	0.793622	2.388e-15	4.045	4.0134	3.9963	4.0228	3.9606	4.0055	5.0754	5.0331	5.0582	5.0425	5.0422	5.0447	Fatty Acyls	Fatty acids and conjugates	Lipids and lipid-like molecules
Pentosidine	C17H26N6O4	0.698754	3.063e-09	3.3835	3.3956	3.386	3.1587	2.9483	3.2421	4.6808	4.6363	4.6664	4.6437	4.6403	4.6537	Carboxylic acids and derivatives	Amino acids, peptides, and analogues	Organic acids and derivatives
1-(beta-D-Glucopyranosyloxy)-3-octanone	C14H26O7	0.768536	3.571e-13	3.5922	3.5321	3.6641	3.5691	3.5887	3.5095	4.6597	4.6575	4.6438	4.6562	4.6407	4.6631	Fatty Acyls	Fatty acyl glycosides	Lipids and lipid-like molecules
Undecanedioic acid	C11H20O4	0.815904	3.162e-11	3.6096	3.5469	3.6055	3.5096	3.5824	3.4473	4.3536	4.3466	4.3721	4.3455	4.3458	4.344	Fatty Acyls	Fatty acids and conjugates	Lipids and lipid-like molecules
N-(1-Deoxy-1-fructosyl)valine	C11H21NO7	0.880237	8.016e-18	5.0487	5.0464	5.0272	5.0472	5.0454	5.0382	5.7328	5.7153	5.7336	5.721	5.7253	5.7381	Carboxylic acids and derivatives	Amino acids, peptides, and analogues	Organic acids and derivatives
Lysyl-Threonine	C10H21N3O4	0.81375	4.059e-16	4.1943	4.201	4.1433	4.1982	4.2062	4.1961	5.1554	5.1375	5.1553	5.1417	5.1591	5.148	Carboxylic acids and derivatives	Amino acids, peptides, and analogues	Organic acids and derivatives
Osmundalactone	C6H8O3	0.909888	7.992e-20	5.6027	5.6025	5.6021	5.6062	5.5998	5.6111	6.1614	6.1506	6.163	6.1574	6.16	6.1619	Pyrans	Pyranones and derivatives	Organoheterocyclic compounds
4-O-Methylgalactinol	C13H24O11	0.881743	2.022e-16	5.108	5.1193	5.1041	5.0932	5.0836	5.0946	5.7955	5.789	5.7914	5.766	5.784	5.7799	Organooxygen compounds	Carbohydrates and carbohydrate conjugates	Organic oxygen compounds
Threoninyl-Phenylalanine	C13H18N2O4	0.845862	7.991e-14	4.0094	4.002	4.0246	3.9759	4.0646	4.0226	4.749	4.7567	4.7695	4.7451	4.7315	4.7449	Carboxylic acids and derivatives	Amino acids, peptides, and analogues	Organic acids and derivatives
Glycerophosphocholine	C8H20NO6P	0.820517	2.748e-15	4.886	4.8014	4.8521	4.8856	4.8502	4.8537	5.9093	5.9207	5.91	5.9383	5.9169	5.9062	Glycerophospholipids	Glycerophosphocholines	Lipids and lipid-like molecules
Argininosuccinic acid	C10H18N4O6	0.906151	1.13e-18	5.7092	5.7239	5.7146	5.72	5.7148	5.7141	6.3006	6.3052	6.3132	6.3162	6.312	6.3007	Carboxylic acids and derivatives	Amino acids, peptides, and analogues	Organic acids and derivatives
Lysinoalanine	C9H19N3O4	0.84229	1.348e-16	4.8087	4.8284	4.7927	4.8416	4.7953	4.8046	5.7198	5.7015	5.7058	5.719	5.717	5.717	Carboxylic acids and derivatives	Amino acids, peptides, and analogues	Organic acids and derivatives

## Sheet: ZD_2 vs WL440_2 up-regulated
Metabolite	Formula	FC(ZD2/WL440_2)	P_value	ZD2_1	ZD2_2	ZD2_3	ZD2_4	ZD2_5	ZD2_6	WL440_2_1	WL440_2_2	WL440_2_3	WL440_2_4	WL440_2_5	WL440_2_6	HMDB Subclass	subclass	HMDB Superclass
Glucosamine 6-sulfate	C6H13NO8S	1.11651	7.448e-10	4.5551	4.5637	4.6092	4.5481	4.5639	4.4731	4.063	4.1073	4.0638	4.0706	4.0428	4.1138	Organooxygen compounds	Carbohydrates and carbohydrate conjugates	Organic oxygen compounds
Alanyl-Hydroxyproline	C8H14N2O4	1.2442	2.331e-06	3.2245	3.2501	3.227	3.1121	3.2314	3.2427	2.5787	2.6299	2.3353	2.59	2.8119	2.5601	Carboxylic acids and derivatives	Amino acids, peptides, and analogues	Organic acids and derivatives
Pseudooxynicotine	C10H14N2O	1.12455	1.971e-16	4.9523	4.9349	4.9549	4.9358	4.9542	4.9571	4.3983	4.4086	4.3965	4.3932	4.3911	4.4119	Organooxygen compounds	Carbonyl compounds	Organic oxygen compounds
6-Gingesulfonic acid	C17H26O6S	1.09776	2.995e-14	4.5353	4.5447	4.5444	4.5665	4.5469	4.5516	4.1543	4.1343	4.1358	4.158	4.1275	4.1481	Phenols	Methoxyphenols	Benzenoids
Macaridine	C13H13NO2	1.07586	7.556e-15	5.9152	5.9164	5.937	5.9253	5.9445	5.9279	5.5153	5.5207	5.5159	5.504	5.5075	5.4973	Pyridines and derivatives	Hydropyridines	Organoheterocyclic compounds
()-3-Hydroxynonanoic acid	C9H18O3	1.2053	1.812e-15	3.8351	3.8197	3.8047	3.8132	3.8143	3.8466	3.1786	3.1755	3.1778	3.1663	3.1495	3.1797	Hydroxy acids and derivatives	Medium-chain hydroxy acids and derivatives	Organic acids and derivatives
(3b,4b,11b,14b)-11-Ethoxy-3,4-epoxy-14-hydroxy-12-cyathen-15-al 14-xyloside	C27H42O8	1.1009	2.558e-13	5.0436	5.0349	5.0468	5.0271	5.0587	5.0358	4.5838	4.5575	4.6118	4.5593	4.5832	4.5788	Prenol lipids	Diterpenoids	Lipids and lipid-like molecules
PG(18:0/20:3(5Z,8Z,11Z))	C44H81O10P	1.08429	3.978e-11	5.2348	5.2137	5.1623	5.2109	5.1907	5.1677	4.791	4.7994	4.7943	4.8159	4.7928	4.7636	Glycerophospholipids	Glycerophosphoglycerols	Lipids and lipid-like molecules
Goshonoside F1	C26H44O8	1.10014	6.479e-15	5.6708	5.654	5.6714	5.6624	5.6446	5.6451	5.1539	5.1515	5.1352	5.1458	5.1208	5.1506	Prenol lipids	Terpene glycosides	Lipids and lipid-like molecules
Kudzusaponin SA4	C47H74O20	1.11866	6.693e-13	5.4868	5.5535	5.5571	5.5498	5.533	5.5256	4.9176	4.9418	4.9672	4.9432	4.9483	4.9637	Prenol lipids	Terpene glycosides	Lipids and lipid-like molecules
4-Hydroxy-8-methoxy-2H-furo[2,3-h]-1-benzopyran-2-one	C12H8O5	2.36196	9.197e-21	4.3039	4.3569	4.3641	4.3497	4.341	4.3597	1.8404	1.8418	1.8408	1.8411	1.839	1.8395	Coumarins and derivatives	Furanocoumarins	Phenylpropanoids and polyketides
Mecamylamine	C11H21N	1.17487	1.531e-05	2.9054	2.8314	2.8508	2.877	2.9418	2.9247	2.4052	2.2818	2.4089	2.4398	2.5828	2.6329	Prenol lipids	Monoterpenoids	Lipids and lipid-like molecules
Pisumionoside	C19H32O9	1.15236	1.105e-12	4.6893	4.6877	4.7117	4.6655	4.7388	4.6867	4.1138	4.0876	4.0841	4.0582	4.0445	4.0659	Prenol lipids	Terpene glycosides	Lipids and lipid-like molecules
Methyl (3x,10R)-dihydroxy-11-dodecene-6,8-diynoate 10-glucoside	C19H26O9	1.16334	1.557e-11	4.0423	3.9934	4.0108	4.0274	4.0091	4.021	3.4904	3.42	3.4314	3.4842	3.4053	3.487	Fatty Acyls	Fatty acyl glycosides	Lipids and lipid-like molecules
2-(2,6-dihydroxy-3,4-dimethoxycyclohexylidene)acetonitrile	C10H15NO4	1.12842	1.148e-10	3.8472	3.8516	3.8478	3.8405	3.8206	3.8332	3.4042	3.3532	3.438	3.361	3.424	3.4392	Organooxygen compounds	Alcohols and polyols	Organic oxygen compounds
Valyl-Valine	C10H20N2O3	1.11913	3.194e-17	5.247	5.2259	5.2551	5.2397	5.2406	5.246	4.6904	4.6899	4.681	4.6772	4.6836	4.68	Carboxylic acids and derivatives	Amino acids, peptides, and analogues	Organic acids and derivatives
2-[(sulfooxy)methyl]butanoic acid	C5H10O6S	1.13659	1.091e-14	4.3431	4.3459	4.3443	4.3609	4.3607	4.358	3.8292	3.8313	3.8467	3.8472	3.809	3.8105	Fatty Acyls	Fatty acids and conjugates	Lipids and lipid-like molecules
N-gamma-Glutamyl-S-allylcysteine	C11H18N2O5S	1.13101	1.886e-12	4.189	4.2113	4.2343	4.2196	4.203	4.2218	3.7485	3.7275	3.7185	3.7584	3.7011	3.6975	Carboxylic acids and derivatives	Amino acids, peptides, and analogues	Organic acids and derivatives
Glutamylproline	C10H16N2O5	1.14632	6.363e-17	4.9665	4.9537	4.9782	4.9669	4.9694	4.9687	4.3385	4.3321	4.3426	4.3374	4.3363	4.3116	Carboxylic acids and derivatives	Amino acids, peptides, and analogues	Organic acids and derivatives
Prolyl-Cysteine	C8H14N2O3S	1.09919	4.053e-18	4.8746	4.8746	4.8826	4.8792	4.8696	4.8781	4.4378	4.4277	4.4389	4.4393	4.4305	4.4416	Carboxylic acids and derivatives	Amino acids, peptides, and analogues	Organic acids and derivatives
Gypsogenin 3-O-b-D-glucuronide	C36H54O10	1.1364	7.053e-10	5.3114	5.3515	5.3065	5.3433	5.3503	5.3291	4.5762	4.7202	4.7518	4.756	4.6817	4.669	Prenol lipids	Terpene glycosides	Lipids and lipid-like molecules
Beta-Elemolic acid	C30H48O3	1.30385	2.145e-12	5.1545	5.1219	5.1586	5.1435	5.1551	5.1348	4.0262	3.8422	3.9394	4.0212	3.9536	3.8948	Prenol lipids	Triterpenoids	Lipids and lipid-like molecules
Methionyl-Glutamate	C10H18N2O5S	1.10049	2.006e-14	5.1173	5.1137	5.125	5.1396	5.1398	5.1134	4.6698	4.667	4.6462	4.6403	4.6493	4.6678	Carboxylic acids and derivatives	Amino acids, peptides, and analogues	Organic acids and derivatives
Araliasaponin II	C47H76O19	1.23897	5.422e-11	5.7582	5.7286	5.7456	5.7861	5.7609	5.7484	4.6126	4.5821	4.6332	4.5566	4.6748	4.8124	Prenol lipids	Terpene glycosides	Lipids and lipid-like molecules
Glutaminylproline	C10H17N3O4	1.2272	4.752e-14	5.7701	5.7851	5.7817	5.7803	5.8065	5.7875	4.683	4.7448	4.7689	4.7089	4.6508	4.7289	Carboxylic acids and derivatives	Amino acids, peptides, and analogues	Organic acids and derivatives
Hypoxanthine	C5H4N4O	1.08615	1.039e-17	5.2687	5.272	5.2567	5.2753	5.2693	5.2756	4.8521	4.8497	4.8486	4.8565	4.8525	4.8514	Imidazopyrimidines	Purines and purine derivatives	Organoheterocyclic compounds
Bisnorbiotin	C8H12N2O3S	1.07925	1.332e-15	5.5449	5.5443	5.5542	5.5564	5.5721	5.5623	5.1456	5.1523	5.1524	5.146	5.1404	5.1536	Carboxylic acids and derivatives	Amino acids, peptides, and analogues	Organic acids and derivatives
2-S-glutathionyl acetate	C12H19N3O8S	1.11672	4.972e-11	4.4848	4.4949	4.528	4.5125	4.5607	4.5175	4.0883	4.0247	4.0098	4.0272	4.063	4.0516	Carboxylic acids and derivatives	Amino acids, peptides, and analogues	Organic acids and derivatives
Hydroxydesmthyl doxepin glucuronide	C25H29NO8	1.99806	4.131e-07	3.031	3.4323	3.4421	2.6713	2.7691	3.1995	1.5499	1.5461	1.5463	1.5429	1.5479	1.5466	Benzoxepines	Dibenzoxepines	Organoheterocyclic compounds
Merodesmosine	C18H34N4O6	1.1656	2.578e-07	3.8296	3.7992	3.782	3.8244	3.8836	3.8125	3.3808	3.1563	3.2247	3.1824	3.3841	3.3486	Carboxylic acids and derivatives	Amino acids, peptides, and analogues	Organic acids and derivatives
(Z)-3-Oxo-2-(2-pentenyl)-1-cyclopenteneacetic acid	C12H16O3	1.29879	2.993e-13	4.9588	4.9458	4.9553	4.9523	4.9524	4.9441	3.819	3.8892	3.7511	3.7622	3.7832	3.8668	Organooxygen compounds	Carbonyl compounds	Organic oxygen compounds
Elatoside H	C42H66O15	1.07431	1.584e-12	6.031	5.9954	5.9949	5.9999	6.0383	6.0238	5.5766	5.5906	5.5928	5.6212	5.6019	5.6039	Prenol lipids	Terpene glycosides	Lipids and lipid-like molecules
Ginsenoside Mc	C41H70O12	1.07376	2.09e-09	5.7589	5.7562	5.7984	5.7375	5.7906	5.7489	5.3381	5.4107	5.3319	5.4302	5.3381	5.3676	Prenol lipids	Terpene glycosides	Lipids and lipid-like molecules
7a-Hydroxytestosterone	C19H28O3	1.10559	4.928e-08	5.4233	5.3337	5.414	5.3798	5.3702	5.3687	4.8992	4.9158	4.9019	4.8727	4.9129	4.707	Steroids and steroid derivatives	Androstane steroids	Lipids and lipid-like molecules
Muricatenol	C37H68O6	1.1762	2.178e-11	5.443	5.3533	5.4118	5.3717	5.4697	5.39	4.6472	4.5674	4.6286	4.6294	4.5366	4.5726	Fatty Acyls	Fatty alcohols	Lipids and lipid-like molecules
CPA(18:1(11Z)/0:0)	C21H39O6P	1.21205	0.003315	4.4467	4.3338	4.1948	3.3364	4.3424	4.2071	3.3311	3.3271	3.3273	3.3238	3.329	3.8736	Glycerophospholipids	Glycerophosphates	Lipids and lipid-like molecules
1-(11Z,14Z-eicosadienoyl)-glycero-3-phosphate	C23H43O7P	1.1031	3.451e-11	5.2585	5.2507	5.2106	5.213	5.2489	5.2127	4.7415	4.7655	4.7844	4.6981	4.7533	4.7128	Glycerophospholipids	Glycerophosphates	Lipids and lipid-like molecules
PG(18:0/18:2(9Z,12Z))	C42H79O10P	1.14601	6.323e-05	4.791	4.6308	4.4663	4.8755	4.7904	4.7955	4.3794	4.0174	4.0175	4.0141	4.0193	4.2928	Glycerophospholipids	Glycerophosphoglycerols	Lipids and lipid-like molecules
(3beta,23E)-3-Hydroxy-27-norcycloart-23-en-25-one	C29H46O2	1.10813	1.217e-07	5.0847	5.0896	5.1009	5.0359	5.1262	5.0594	4.543	4.5444	4.6976	4.5956	4.4688	4.6736	Steroids and steroid derivatives	Cycloartanols and derivatives	Lipids and lipid-like molecules
Squamocin L	C37H66O6	1.15813	3.071e-07	5.1729	5.1518	5.1727	5.1236	5.2059	5.2435	4.5391	4.6384	4.3943	4.4425	4.5632	4.2505	Fatty Acyls	Fatty alcohols	Lipids and lipid-like molecules
N-Monodemethyl roxithromycin	C39H72N2O15	1.09024	3.53e-07	5.5255	5.5411	5.463	5.4851	5.4736	5.4948	5.1463	5.084	5.0672	5.0826	4.8978	4.974	Organooxygen compounds	Carbohydrates and carbohydrate conjugates	Organic oxygen compounds
Dynorphin A (6-8)	C18H37N9O4	1.3594	2.174e-09	4.3196	4.3699	4.3458	4.3564	4.4152	4.2694	3.3366	3.302	3.2836	2.9999	3.1553	3.104	Carboxylic acids and derivatives	Amino acids, peptides, and analogues	Organic acids and derivatives
L-Agaridoxin	C11H14N2O5	1.12407	6.361e-13	5.2516	5.2674	5.2858	5.2767	5.3133	5.2992	4.7353	4.7026	4.6848	4.7035	4.7002	4.6686	Carboxylic acids and derivatives	Amino acids, peptides, and analogues	Organic acids and derivatives
Pentosidine	C17H26N6O4	1.14628	1.399e-05	3.4844	3.4613	3.1226	3.4028	3.4516	3.4349	2.9633	2.9594	2.9596	2.9561	2.9613	2.9599	Carboxylic acids and derivatives	Amino acids, peptides, and analogues	Organic acids and derivatives
5-Acetyl-2,4-dimethyloxazole	C7H9NO2	1.08104	6.782e-17	5.2146	5.2157	5.216	5.2177	5.2137	5.2168	4.835	4.8213	4.8271	4.8325	4.8133	4.8192	Azoles	Oxazoles	Organoheterocyclic compounds
N-(1-Deoxy-1-fructosyl)valine	C11H21NO7	1.08617	1.008e-17	5.9739	5.9777	5.9802	5.9773	5.9771	5.9653	5.4978	5.492	5.5047	5.4975	5.5008	5.511	Carboxylic acids and derivatives	Amino acids, peptides, and analogues	Organic acids and derivatives
Osmundalactone	C6H8O3	1.14384	1.686e-19	5.8259	5.8292	5.8221	5.834	5.8341	5.8316	5.1	5.1	5.104	5.0845	5.0903	5.0944	Pyrans	Pyranones and derivatives	Organoheterocyclic compounds
4-O-Methylgalactinol	C13H24O11	1.31559	8.026e-13	4.8641	4.8719	4.886	4.8571	4.8824	4.8535	3.697	3.6538	3.7764	3.645	3.6508	3.7803	Organooxygen compounds	Carbohydrates and carbohydrate conjugates	Organic oxygen compounds
Porphobilinogen	C10H14N2O4	1.13031	1.531e-14	5.0738	5.0725	5.0819	5.0772	5.0988	5.0928	4.4837	4.4872	4.5075	4.4795	4.4922	4.5298	Organonitrogen compounds	Amines	Organic nitrogen compounds
Valyl-Phenylalanine	C14H20N2O3	1.07932	1.894e-14	5.6921	5.6832	5.6781	5.6872	5.6976	5.6897	5.2856	5.2812	5.2825	5.2636	5.2548	5.255	Carboxylic acids and derivatives	Amino acids, peptides, and analogues	Organic acids and derivatives
Lysyl-Asparagine	C10H20N4O4	1.08919	2.291e-14	5.3021	5.2947	5.2887	5.2957	5.3149	5.3047	4.8886	4.8676	4.8735	4.8627	4.8553	4.8491	Carboxylic acids and derivatives	Amino acids, peptides, and analogues	Organic acids and derivatives
Threoninyl-Phenylalanine	C13H18N2O4	1.26435	4.467e-07	3.7194	3.6791	3.632	3.7081	3.6526	3.678	3.0521	2.8361	3.1137	2.7397	2.7384	2.9732	Carboxylic acids and derivatives	Amino acids, peptides, and analogues	Organic acids and derivatives
N5-Acetyl-N2-gamma-L-glutamyl-L-ornithine	C12H21N3O6	1.24265	1.168e-10	4.5478	4.5532	4.5739	4.555	4.5813	4.567	3.5249	3.7466	3.6733	3.682	3.7406	3.6674	Carboxylic acids and derivatives	Amino acids, peptides, and analogues	Organic acids and derivatives
Methyl helianthenoate A glucoside	C19H24O8	1.08112	6.517e-13	5.6108	5.6344	5.6235	5.6003	5.6293	5.6441	5.2293	5.1896	5.1959	5.2011	5.1851	5.2117	Fatty Acyls	Fatty acyl glycosides	Lipids and lipid-like molecules

## Sheet: ZD_2 vs WL440_2 down-regulated
Metabolite	Formula	FC(ZD2/WL440_2)	P_value	ZD2_1	ZD2_2	ZD2_3	ZD2_4	ZD2_5	ZD2_6	WL440_2_1	WL440_2_2	WL440_2_3	WL440_2_4	WL440_2_5	WL440_2_6	HMDB Subclass	subclass	HMDB Superclass
L-Tryptophan	C11H12N2O2	0.886924	6.379e-16	4.8177	4.8088	4.8271	4.8231	4.8064	4.8129	5.4175	5.4268	5.425	5.4365	5.4165	5.455	Indoles and derivatives	Indolyl carboxylic acids and derivatives	Organoheterocyclic compounds
Cynaratriol	C15H22O5	0.836962	1.282e-20	4.729	4.7341	4.7282	4.7231	4.7326	4.7224	5.6439	5.6569	5.6468	5.6562	5.6515	5.6395	Prenol lipids	Terpene lactones	Lipids and lipid-like molecules
N-Malonyltryptophan	C14H14N2O5	0.88598	3.545e-14	4.1075	4.1001	4.1057	4.1072	4.0926	4.0561	4.6113	4.6228	4.6273	4.6232	4.6154	4.6322	Carboxylic acids and derivatives	Amino acids, peptides, and analogues	Organic acids and derivatives
Linalool oxide D 3-[apiosyl-(1->6)-glucoside]	C21H36O11	0.872915	8.162e-21	3.9774	3.9769	3.9782	3.9756	3.9784	3.9754	4.5572	4.5588	4.5471	4.5541	4.5574	4.561	Organooxygen compounds	Carbohydrates and carbohydrate conjugates	Organic oxygen compounds
LysoPE(0:0/18:3(6Z,9Z,12Z))	C23H42NO7P	0.87064	9.437e-13	4.1714	4.1718	4.2491	4.1897	4.2104	4.1647	4.822	4.8058	4.841	4.8124	4.8093	4.806	Glycerophospholipids	Glycerophosphoethanolamines	Lipids and lipid-like molecules
LysoPC(18:2(9Z,12Z))	C26H50NO7P	0.893996	1.246e-16	5.2729	5.2658	5.277	5.2821	5.2744	5.2519	5.8848	5.9019	5.912	5.8915	5.8924	5.8927	Glycerophospholipids	Glycerophosphocholines	Lipids and lipid-like molecules
LysoPC(15:0)	C23H48NO7P	0.860119	1.521e-13	4.3851	4.3451	4.3377	4.3311	4.3097	4.3033	5.0171	5.0313	5.0468	5.0538	5.0559	5.0342	Glycerophospholipids	Glycerophosphocholines	Lipids and lipid-like molecules
Canavalioside	C26H42O12	0.858941	6.756e-12	3.7085	3.7036	3.6912	3.6118	3.6833	3.7083	4.2892	4.2766	4.2727	4.3048	4.2753	4.3178	Prenol lipids	Terpene glycosides	Lipids and lipid-like molecules
Dihydrocarveol acetate	C12H20O2	0.760095	1.318e-15	3.1816	3.1784	3.2002	3.1725	3.2377	3.2287	4.1912	4.2135	4.2113	4.217	4.2183	4.2116	Prenol lipids	Monoterpenoids	Lipids and lipid-like molecules
7,8-Dihydrovomifoliol 9-[apiosyl-(1->6)-glucoside]	C24H40O12	0.577413	3.992e-17	2.3487	2.3483	2.3496	2.3592	2.3877	2.3468	4.1031	4.1345	4.077	4.061	4.0489	4.068	Fatty Acyls	Fatty acyl glycosides	Lipids and lipid-like molecules
Lactupicrin	C23H22O7	0.883918	8.752e-16	4.2726	4.29	4.2976	4.2697	4.2838	4.3058	4.8424	4.8618	4.8485	4.8512	4.8528	4.8444	Phenols	1-hydroxy-2-unsubstituted benzenoids	Benzenoids
Cynaroside A	C21H32O10	0.899892	3.941e-12	4.9928	4.9638	5.0385	4.949	4.9993	4.9919	5.5381	5.5528	5.5296	5.5589	5.5198	5.5666	Prenol lipids	Terpene lactones	Lipids and lipid-like molecules
Feruloyl C1-glucuronide	C16H18O10	0.905234	3.431e-11	3.9188	3.9245	3.8922	3.9482	3.911	3.9626	4.3511	4.3551	4.3573	4.3084	4.3335	4.3161	Isoflavonoids	Isoflavonoid O-glycosides	Phenylpropanoids and polyketides
LysoPC(0:0/18:0)	C26H54NO7P	0.829896	5.777e-06	3.7066	4.055	4.1235	3.5584	3.9913	3.9814	4.6509	4.7826	4.6476	4.7214	4.7084	4.7061	Glycerophospholipids	Glycerophosphocholines	Lipids and lipid-like molecules
Lucidone A	C24H34O5	0.881247	1.167e-09	3.9062	3.8123	3.9022	3.8327	3.8594	3.7536	4.3582	4.364	4.375	4.3668	4.3701	4.3363	Prenol lipids	Sesquiterpenoids	Lipids and lipid-like molecules
2-Methyl-1,3-cyclohexadiene	C7H10	0.883266	2.395e-08	4.3289	4.2955	4.3102	4.4577	4.4125	4.4837	4.9972	4.9548	5.0042	4.89	4.9406	4.9749	Unsaturated hydrocarbons	Branched unsaturated hydrocarbons	Hydrocarbons
Cysteinyl-Hydroxyproline	C8H14N2O4S	0.916123	2.711e-13	5.0318	5.0634	5.0711	5.0447	5.0807	5.0517	5.5218	5.5125	5.5233	5.5455	5.5036	5.5157	Carboxylic acids and derivatives	Amino acids, peptides, and analogues	Organic acids and derivatives
Medicanine	C7H13NO3	0.772946	4.998e-17	4.923	5.0091	4.9734	4.9806	4.9881	4.9876	6.4233	6.4414	6.4509	6.4409	6.4323	6.4426	Carboxylic acids and derivatives	Amino acids, peptides, and analogues	Organic acids and derivatives
Ergothioneine	C9H15N3O2S	0.897583	7.411e-05	3.7202	3.8238	3.872	3.4798	3.8374	3.7699	4.1817	4.2971	4.117	4.072	4.2022	4.2037	Carboxylic acids and derivatives	Amino acids, peptides, and analogues	Organic acids and derivatives
Acoric acid	C15H24O4	0.672078	4.938e-09	2.4044	2.798	2.405	2.4435	2.4388	2.412	3.6205	3.7528	3.6659	3.7229	3.709	3.7072	Prenol lipids	Monoterpenoids	Lipids and lipid-like molecules
2,6-Di-tert-butyl-4-ethylphenol	C16H26O	0.898759	1.743e-09	4.1305	3.993	4.0063	4.0376	4.0794	4.0952	4.5121	4.5154	4.5002	4.5042	4.5297	4.5208	Benzene and substituted derivatives	Phenylpropanes	Benzenoids
(Z)-9-Cycloheptadecen-1-one	C17H30O	0.910195	1.137e-07	4.1966	4.0679	4.2869	4.2034	4.2296	4.1897	4.5781	4.6428	4.6014	4.6064	4.5909	4.6382	Organooxygen compounds	Carbonyl compounds	Organic oxygen compounds
2-Amino-4-ethoxy-3-hydroxybutanoic acid	C6H13NO4	0.884577	7.361e-09	3.5107	3.5732	3.5258	3.5795	3.5394	3.4666	4.0651	4.0105	3.9176	4.0103	3.9848	3.977	Carboxylic acids and derivatives	Amino acids, peptides, and analogues	Organic acids and derivatives
Jasmolone glucoside	C17H26O7	0.697046	1.899e-14	2.4766	2.4868	2.4772	2.475	2.4791	2.4736	3.5945	3.5967	3.4975	3.5543	3.5176	3.5691	Organooxygen compounds	Carbohydrates and carbohydrate conjugates	Organic oxygen compounds
(1R)-Glutathionyl-(2R)-hydroxy-1,2-dihydronaphthalene	C20H25N3O7S	0.818673	3.822e-17	4.5513	4.5415	4.5034	4.5522	4.5571	4.5467	5.5563	5.5416	5.5473	5.5506	5.5415	5.5504	Carboxylic acids and derivatives	Amino acids, peptides, and analogues	Organic acids and derivatives
Tyramine glucuronide	C14H19NO7	0.936673	1.18e-16	5.8637	5.8728	5.869	5.864	5.8819	5.8812	6.2712	6.2721	6.2719	6.2623	6.2657	6.2715	Organooxygen compounds	Carbohydrates and carbohydrate conjugates	Organic oxygen compounds
Cytosine	C4H5N3O	0.912572	1.453e-12	4.5862	4.6372	4.643	4.6317	4.6197	4.6275	5.07	5.0893	5.0775	5.0686	5.0469	5.0502	Diazines	Pyrimidines and pyrimidine derivatives	Organoheterocyclic compounds

## Sheet: WL440_2 vs WL440_1 up-regulated
Metabolite	Formula	FC(WL440_2/WL440_1)	P_value	WL440_1_1	WL440_1_2	WL440_1_3	WL440_1_4	WL440_1_5	WL440_1_6	WL440_2_1	WL440_2_2	WL440_2_3	WL440_2_4	WL440_2_5	WL440_2_6	HMDB Subclass	subclass	HMDB Superclass
L-Tryptophan	C11H12N2O2	1.12632	9.932e-16	4.8096	4.819	4.8292	4.8106	4.8244	4.8315	5.4175	5.4268	5.425	5.4365	5.4165	5.455	Indoles and derivatives	Indolyl carboxylic acids and derivatives	Organoheterocyclic compounds
Stachyose	C24H42O21	1.09512	1.996e-12	5.5914	5.6046	5.5618	5.6306	5.5888	5.5824	6.1359	6.1267	6.1599	6.1134	6.1198	6.0934	Organooxygen compounds	Carbohydrates and carbohydrate conjugates	Organic oxygen compounds
N-Malonyltryptophan	C14H14N2O5	1.13257	1.205e-16	4.0761	4.0815	4.0868	4.0636	4.0864	4.0899	4.6113	4.6228	4.6273	4.6232	4.6154	4.6322	Carboxylic acids and derivatives	Amino acids, peptides, and analogues	Organic acids and derivatives
Undecanoic acid	C11H22O2	1.18839	1.375e-14	3.353	3.4072	3.3859	3.3488	3.3877	3.3754	4.0101	4.0058	4.0106	4.013	4.0255	4.0082	Fatty Acyls	Fatty acids and conjugates	Lipids and lipid-like molecules
Lactupicrin	C23H22O7	1.22289	2.638e-16	3.965	3.9324	3.9893	3.9798	3.9761	3.9527	4.8424	4.8618	4.8485	4.8512	4.8528	4.8444	Phenols	1-hydroxy-2-unsubstituted benzenoids	Benzenoids
Prolyl-Cysteine	C8H14N2O3S	1.12446	2.323e-17	3.9324	3.9445	3.9433	3.9562	3.947	3.9474	4.4378	4.4277	4.4389	4.4393	4.4305	4.4416	Carboxylic acids and derivatives	Amino acids, peptides, and analogues	Organic acids and derivatives
L-Fucose	C6H12O5	1.14846	1.472e-12	4.1048	4.1093	4.051	4.1073	4.1034	4.139	4.694	4.7371	4.7264	4.71	4.6791	4.7193	Organooxygen compounds	Carbohydrates and carbohydrate conjugates	Organic oxygen compounds
5,6-Dihydro-5-fluorouracil	C4H5FN2O2	1.14221	4.433e-14	4.1673	4.15	4.2061	4.1894	4.2032	4.1908	4.7856	4.7753	4.7645	4.7855	4.7949	4.7699	Diazines	Pyrimidines and pyrimidine derivatives	Organoheterocyclic compounds
Gypsogenin 3-O-b-D-glucuronide	C36H54O10	1.20462	2.126e-08	3.8754	3.761	4.0081	3.994	3.7912	3.9419	4.5762	4.7202	4.7518	4.756	4.6817	4.669	Prenol lipids	Terpene glycosides	Lipids and lipid-like molecules
Ginsenoside Rh7	C36H60O9	1.14016	9.048e-12	4.6079	4.4815	4.5645	4.5488	4.5738	4.5752	5.2171	5.1999	5.1953	5.1734	5.1946	5.2088	Prenol lipids	Triterpenoids	Lipids and lipid-like molecules
L-alpha-Aspartyl-L-hydroxyproline	C9H14N2O6	1.12611	9.013e-14	4.5274	4.4992	4.4701	4.4906	4.4728	4.4658	5.0503	5.0399	5.0621	5.0628	5.0481	5.059	Carboxylic acids and derivatives	Amino acids, peptides, and analogues	Organic acids and derivatives
2-Methyl-1,3-cyclohexadiene	C7H10	1.14656	3.866e-08	4.2723	4.4648	4.2623	4.4309	4.2794	4.2448	4.9972	4.9548	5.0042	4.89	4.9406	4.9749	Unsaturated hydrocarbons	Branched unsaturated hydrocarbons	Hydrocarbons
N6-Acetyl-5S-hydroxy-L-lysine	C8H16N2O4	1.14525	5.571e-10	4.5069	4.3633	4.4747	4.4872	4.466	4.549	5.1373	5.0679	5.146	5.1542	5.1128	5.131	Carboxylic acids and derivatives	Amino acids, peptides, and analogues	Organic acids and derivatives
Beta-D-Fructofuranosyl alpha-D-glucopyranosyl-(1->4)-D-glucopyranoside	C18H32O16	1.11092	4.736e-16	5.7368	5.6993	5.7086	5.7135	5.7153	5.7226	6.3348	6.3555	6.3563	6.3624	6.3396	6.3488	Organooxygen compounds	Carbohydrates and carbohydrate conjugates	Organic oxygen compounds
Cysteinyl-Hydroxyproline	C8H14N2O4S	1.15216	8.259e-16	4.8002	4.7922	4.7793	4.8138	4.7752	4.7846	5.5218	5.5125	5.5233	5.5455	5.5036	5.5157	Carboxylic acids and derivatives	Amino acids, peptides, and analogues	Organic acids and derivatives
Medicanine	C7H13NO3	1.29505	1.408e-18	4.9534	4.9737	4.957	4.9663	5.0071	4.9749	6.4233	6.4414	6.4509	6.4409	6.4323	6.4426	Carboxylic acids and derivatives	Amino acids, peptides, and analogues	Organic acids and derivatives
Bisnorbiotin	C8H12N2O3S	1.23099	1.656e-16	4.1614	4.1796	4.1827	4.2177	4.1567	4.1926	5.1456	5.1523	5.1524	5.146	5.1404	5.1536	Carboxylic acids and derivatives	Amino acids, peptides, and analogues	Organic acids and derivatives
2-S-glutathionyl acetate	C12H19N3O8S	1.41895	1.14e-07	2.9643	2.4328	2.9322	2.7853	2.9846	3.0017	4.0883	4.0247	4.0098	4.0272	4.063	4.0516	Carboxylic acids and derivatives	Amino acids, peptides, and analogues	Organic acids and derivatives
4'-Methylliquiritigenin 7-rhamnoside	C22H24O8	1.25685	1.043e-14	3.6287	3.5832	3.6717	3.6001	3.5955	3.5995	4.538	4.5349	4.5512	4.533	4.5425	4.546	Flavonoids	Flavonoid glycosides	Phenylpropanoids and polyketides
Xanthoxylin	C10H12O4	1.20632	1.694e-14	3.7772	3.7833	3.7764	3.8408	3.8176	3.8061	4.5694	4.5876	4.5989	4.5777	4.5714	4.6011	Organooxygen compounds	Carbonyl compounds	Organic oxygen compounds
Alpha-Terpineol propanoate	C13H22O2	1.14849	7.517e-14	4.3543	4.3989	4.3567	4.332	4.3691	4.3709	5.0353	4.9993	4.998	5.0311	5.0092	4.9969	Prenol lipids	Monoterpenoids	Lipids and lipid-like molecules
1-O-beta-D-Glucopyranosyl-2,3-di-O-palmitoylglycerol	C41H78O10	1.33816	6.938e-13	3.8547	3.8444	3.8923	3.8498	3.9313	3.8509	5.2135	5.155	5.0656	5.2205	5.1923	5.2327	Glycerolipids	Glycosylglycerols	Lipids and lipid-like molecules
Diplosporin	C12H16O4	1.20812	6.275e-11	4.0999	3.9822	4.0967	4.0517	4.0205	4.1406	4.887	4.892	4.8641	4.8991	4.9798	4.946	Pyrans	Pyranones and derivatives	Organoheterocyclic compounds
(1R)-Glutathionyl-(2R)-hydroxy-1,2-dihydronaphthalene	C20H25N3O7S	1.30818	9.699e-19	4.2529	4.2207	4.2234	4.2572	4.2595	4.2334	5.5563	5.5416	5.5473	5.5506	5.5415	5.5504	Carboxylic acids and derivatives	Amino acids, peptides, and analogues	Organic acids and derivatives
Simmondsin 2'-ferulate	C26H33NO12	1.19678	1.966e-09	3.7821	3.6834	3.7847	3.7252	3.9313	3.8421	4.5586	4.5367	4.4969	4.5326	4.5601	4.5374	Cinnamic acids and derivatives	Hydroxycinnamic acids and derivatives	Phenylpropanoids and polyketides
N-(1-Deoxy-1-fructosyl)glycine	C8H15NO7	1.25407	5.145e-11	3.5336	3.5427	3.4237	3.4528	3.6164	3.4479	4.3948	4.3775	4.3847	4.3945	4.3944	4.4105	Organooxygen compounds	Carbohydrates and carbohydrate conjugates	Organic oxygen compounds
Cytosine	C4H5N3O	1.20128	2.594e-13	4.2759	4.1939	4.1883	4.2117	4.1832	4.255	5.07	5.0893	5.0775	5.0686	5.0469	5.0502	Diazines	Pyrimidines and pyrimidine derivatives	Organoheterocyclic compounds

## Sheet: WL440_2 vs WL440_1 down-regulat
Metabolite	Formula	FC(WL440_2/WL440_1)	P_value	WL440_1_1	WL440_1_2	WL440_1_3	WL440_1_4	WL440_1_5	WL440_1_6	WL440_2_1	WL440_2_2	WL440_2_3	WL440_2_4	WL440_2_5	WL440_2_6	HMDB Subclass	subclass	HMDB Superclass
Osmanthuside A	C23H26O9	0.877302	1.846e-12	4.8233	4.7947	4.8499	4.8193	4.8531	4.8584	4.2246	4.2014	4.2617	4.2388	4.2722	4.2395	Cinnamic acids and derivatives	Hydroxycinnamic acids and derivatives	Phenylpropanoids and polyketides
N2-(3-Hydroxysuccinoyl)arginine	C10H18N4O6	0.897216	4.424e-11	5.1988	5.2543	5.2522	5.2724	5.2319	5.2559	4.7192	4.742	4.7049	4.7257	4.6373	4.6992	Carboxylic acids and derivatives	Amino acids, peptides, and analogues	Organic acids and derivatives
Cynaratriol	C15H22O5	0.921383	3.484e-17	6.1321	6.1204	6.1288	6.1286	6.1409	6.1337	5.6439	5.6569	5.6468	5.6562	5.6515	5.6395	Prenol lipids	Terpene lactones	Lipids and lipid-like molecules
(Z)-6-Tetradecene-1,3-diyne-5,8-diol	C14H20O2	0.704657	8.202e-20	5.0847	5.0829	5.0988	5.0897	5.0831	5.0973	3.5927	3.5736	3.5834	3.5723	3.5829	3.6127	Fatty Acyls	Fatty alcohols	Lipids and lipid-like molecules
1-(sn-Glycero-3-phospho)-1D-myo-inositol	C9H19O11P	0.852467	5.009e-17	5.9673	5.9571	5.9462	5.9668	5.9597	5.951	5.0773	5.0814	5.1085	5.0744	5.0586	5.0752	Glycerophospholipids	Glycerophosphoinositols	Lipids and lipid-like molecules
Alanyl-Hydroxyproline	C8H14N2O4	0.599954	9.028e-11	4.2948	4.3154	4.3059	4.3187	4.3045	4.3053	2.5787	2.6299	2.3353	2.59	2.8119	2.5601	Carboxylic acids and derivatives	Amino acids, peptides, and analogues	Organic acids and derivatives
Geniposidic Acid	C16H22O10	0.778218	4.864e-16	4.267	4.3018	4.2964	4.3038	4.2621	4.2957	3.3352	3.3399	3.3271	3.3456	3.3619	3.312	Prenol lipids	Terpene glycosides	Lipids and lipid-like molecules
Linalool oxide D 3-[apiosyl-(1->6)-glucoside]	C21H36O11	0.88192	1.083e-19	5.1663	5.1646	5.1618	5.1672	5.1753	5.1626	4.5572	4.5588	4.5471	4.5541	4.5574	4.561	Organooxygen compounds	Carbohydrates and carbohydrate conjugates	Organic oxygen compounds
Persicogenin 3'-glucoside	C23H26O11	0.891436	1.879e-12	4.6218	4.6312	4.6289	4.6441	4.614	4.6063	4.1104	4.106	4.1552	4.0911	4.1157	4.156	Flavonoids	Flavonoid glycosides	Phenylpropanoids and polyketides
Emodin	C15H10O5	0.800909	9.809e-14	4.1697	4.1848	4.1791	4.169	4.191	4.1812	3.3238	3.2987	3.3572	3.3967	3.3291	3.3749	Anthracenes	Anthraquinones	Benzenoids
Jasmonic acid	C12H18O3	0.909755	3.243e-16	5.473	5.4824	5.4767	5.48	5.4637	5.4689	4.9819	4.975	4.9842	4.9644	4.9794	4.9953	Fatty Acyls	Lineolic acids and derivatives	Lipids and lipid-like molecules
Prostaglandin G2 2-glyceryl Ester	C23H38O8	0.88915	1.522e-14	5.1113	5.1053	5.1021	5.1133	5.0979	5.1036	4.5266	4.5596	4.5152	4.561	4.5535	4.5249	Fatty Acyls	Eicosanoids	Lipids and lipid-like molecules
Aflatoxin B2a	C17H14O7	0.88437	2.82e-15	5.3265	5.3288	5.3353	5.3195	5.362	5.3468	4.7146	4.7344	4.7065	4.7087	4.7309	4.7194	Coumarins and derivatives	Furanocoumarins	Phenylpropanoids and polyketides
Fonsecin B	C16H16O6	0.851748	2.727e-13	4.624	4.6314	4.624	4.6299	4.662	4.6333	3.9101	3.9229	3.9382	3.963	3.9528	3.9966	Naphthopyrans	Naphthopyranones	Organoheterocyclic compounds
(S)-9-Hydroxy-10-undecenoic acid	C11H20O3	0.880799	3.249e-15	4.3544	4.3544	4.3433	4.3579	4.3643	4.3505	3.839	3.8425	3.8093	3.8286	3.8532	3.8369	Hydroxy acids and derivatives	Medium-chain hydroxy acids and derivatives	Organic acids and derivatives
4-Hydroxy-8-methoxy-2H-furo[2,3-h]-1-benzopyran-2-one	C12H8O5	0.484211	5.237e-22	3.7856	3.7951	3.8079	3.7871	3.8068	3.8183	1.8404	1.8418	1.8408	1.8411	1.839	1.8395	Coumarins and derivatives	Furanocoumarins	Phenylpropanoids and polyketides
Carbadox	C11H10N4O4	0.895296	1.293e-12	4.8103	4.8008	4.818	4.8002	4.7954	4.7977	4.282	4.3086	4.2815	4.3529	4.2957	4.2825	Diazanaphthalenes	Benzodiazines	Organoheterocyclic compounds
Talaromycin A	C12H22O4	0.908512	1.819e-17	5.8114	5.8106	5.8199	5.8151	5.8161	5.8182	5.2759	5.2804	5.272	5.2979	5.2847	5.2887	Organooxygen compounds	Ethers	Organic oxygen compounds
Mecamylamine	C11H21N	0.588982	1.726e-11	4.1818	4.1657	4.1712	4.1821	4.1683	4.1816	2.4052	2.2818	2.4089	2.4398	2.5828	2.6329	Prenol lipids	Monoterpenoids	Lipids and lipid-like molecules
Pisumionoside	C19H32O9	0.886087	4.525e-12	4.6295	4.5589	4.597	4.6171	4.5963	4.6016	4.1138	4.0876	4.0841	4.0582	4.0445	4.0659	Prenol lipids	Terpene glycosides	Lipids and lipid-like molecules
Canavalioside	C26H42O12	0.837695	2.236e-16	5.1187	5.1073	5.1182	5.1292	5.1292	5.1172	4.2892	4.2766	4.2727	4.3048	4.2753	4.3178	Prenol lipids	Terpene glycosides	Lipids and lipid-like molecules
Dihydrocarveol acetate	C12H20O2	0.898038	1.075e-15	4.6815	4.6829	4.6787	4.6873	4.701	4.6986	4.1912	4.2135	4.2113	4.217	4.2183	4.2116	Prenol lipids	Monoterpenoids	Lipids and lipid-like molecules
Methyl (3x,10R)-dihydroxy-11-dodecene-6,8-diynoate 10-glucoside	C19H26O9	0.693373	4.976e-16	4.9707	4.9866	4.9944	4.9783	4.9621	4.9856	3.4904	3.42	3.4314	3.4842	3.4053	3.487	Fatty Acyls	Fatty acyl glycosides	Lipids and lipid-like molecules
(S)-3-Octanol glucoside	C14H28O6	0.862379	1.937e-17	4.668	4.6629	4.6642	4.6579	4.6659	4.6697	4.0277	4.0053	4.0303	4.0301	4.0332	4.0124	Fatty Acyls	Fatty acyl glycosides	Lipids and lipid-like molecules
7,8-Dihydrovomifoliol 9-[apiosyl-(1->6)-glucoside]	C24H40O12	0.876718	2.659e-12	4.6806	4.6379	4.6457	4.6716	4.6537	4.6452	4.1031	4.1345	4.077	4.061	4.0489	4.068	Fatty Acyls	Fatty acyl glycosides	Lipids and lipid-like molecules
Heptyl 4-hydroxybenzoate	C14H20O3	0.780069	1.111e-15	4.608	4.6157	4.6112	4.5973	4.6104	4.5947	3.6059	3.5922	3.5426	3.5984	3.6259	3.5926	Benzene and substituted derivatives	Benzoic acids and derivatives	Benzenoids
2-(2,6-dihydroxy-3,4-dimethoxycyclohexylidene)acetonitrile	C10H15NO4	0.785187	6.601e-14	4.3228	4.3237	4.3237	4.3396	4.35	4.3456	3.4042	3.3532	3.438	3.361	3.424	3.4392	Organooxygen compounds	Alcohols and polyols	Organic oxygen compounds
Glutamylproline	C10H16N2O5	0.886638	1.05e-15	4.8779	4.8738	4.8883	4.8986	4.8842	4.9019	4.3385	4.3321	4.3426	4.3374	4.3363	4.3116	Carboxylic acids and derivatives	Amino acids, peptides, and analogues	Organic acids and derivatives
N-Acetylmuramate	C11H19NO8	0.885841	3.098e-18	5.4294	5.4321	5.4382	5.4376	5.4348	5.4142	4.8127	4.8155	4.8094	4.8048	4.8092	4.8152	Organooxygen compounds	Carbohydrates and carbohydrate conjugates	Organic oxygen compounds
Abscisic acid	C15H20O4	0.753681	5.861e-20	5.9855	5.9823	5.9875	5.9699	5.9669	5.9644	4.502	4.5031	4.4952	4.4997	4.4977	4.5279	Prenol lipids	Sesquiterpenoids	Lipids and lipid-like molecules
Beta-Elemolic acid	C30H48O3	0.869163	3.941e-09	4.5849	4.5505	4.5385	4.5335	4.4928	4.542	4.0262	3.8422	3.9394	4.0212	3.9536	3.8948	Prenol lipids	Triterpenoids	Lipids and lipid-like molecules
5-(3',4',5'-trihydroxyphenyl)-gamma-valerolactone-O-methyl-4'-O-glucuronide	C18H22O11	0.756632	2.404e-12	4.9978	4.9887	4.9817	4.9538	4.959	4.9769	3.6515	3.6957	3.8272	3.8005	3.8117	3.802	Organooxygen compounds	Carbohydrates and carbohydrate conjugates	Organic oxygen compounds
2-amino-6-hydroxyhexanoic acid	C6H13NO3	0.89923	2.512e-18	6.4882	6.5041	6.4784	6.4884	6.4965	6.4865	5.843	5.8391	5.8366	5.828	5.8357	5.8358	Carboxylic acids and derivatives	Amino acids, peptides, and analogues	Organic acids and derivatives
L-Hexahydro-3-imino-1,2,4-oxadiazepine-3-carboxylic acid	C5H9N3O3	0.897811	3.492e-16	6.2154	6.1962	6.2146	6.2186	6.2218	6.2178	5.5832	5.5628	5.5928	5.5953	5.5703	5.5707	Carboxylic acids and derivatives	Amino acids, peptides, and analogues	Organic acids and derivatives
LysoPC(0:0/18:0)	C26H54NO7P	0.885187	6.682e-11	5.3319	5.3058	5.2953	5.311	5.3001	5.3331	4.6509	4.7826	4.6476	4.7214	4.7084	4.7061	Glycerophospholipids	Glycerophosphocholines	Lipids and lipid-like molecules
Corchorifatty acid F	C18H32O5	0.894356	2.936e-15	5.5159	5.525	5.5346	5.5219	5.5376	5.5329	4.9562	4.9171	4.9517	4.9618	4.935	4.9445	Fatty Acyls	Lineolic acids and derivatives	Lipids and lipid-like molecules
Lucidone A	C24H34O5	0.877843	1.215e-14	4.99	4.9465	4.9866	4.9682	4.9685	4.954	4.3582	4.364	4.375	4.3668	4.3701	4.3363	Prenol lipids	Sesquiterpenoids	Lipids and lipid-like molecules
Gamma-Glutamylthreonine	C9H16N2O6	0.861202	8.016e-15	5.1697	5.1886	5.1778	5.1623	5.1723	5.1687	4.432	4.4506	4.4854	4.4282	4.4576	4.4774	Carboxylic acids and derivatives	Amino acids, peptides, and analogues	Organic acids and derivatives
L-Methionine	C5H11NO2S	0.777473	3.094e-13	4.024	4.0004	4.0365	4.0079	4.0168	3.9895	3.1218	3.1479	3.0846	3.1093	3.0718	3.1841	Carboxylic acids and derivatives	Amino acids, peptides, and analogues	Organic acids and derivatives
Oryzalide B	C19H28O4	0.84599	2.23e-16	5.6342	5.6236	5.6372	5.6273	5.6451	5.6454	4.7584	4.7512	4.7769	4.7876	4.746	4.7901	Prenol lipids	Terpene lactones	Lipids and lipid-like molecules
Acoric acid	C15H24O4	0.844221	1.981e-11	4.3657	4.3994	4.3436	4.4058	4.3719	4.3787	3.6205	3.7528	3.6659	3.7229	3.709	3.7072	Prenol lipids	Monoterpenoids	Lipids and lipid-like molecules
3,4,5-trihydroxy-6-[(2-oxo-3-phenylpropanoyl)oxy]oxane-2-carboxylic acid	C15H16O9	0.577858	6.983e-22	4.4477	4.4491	4.447	4.4477	4.4273	4.4475	2.5669	2.5629	2.5631	2.5876	2.5648	2.5634	Organooxygen compounds	Carbohydrates and carbohydrate conjugates	Organic oxygen compounds
Hydroxydesmthyl doxepin glucuronide	C25H29NO8	0.296417	2.833e-26	5.2323	5.2191	5.2226	5.2055	5.2153	5.2169	1.5499	1.5461	1.5463	1.5429	1.5479	1.5466	Benzoxepines	Dibenzoxepines	Organoheterocyclic compounds
Merodesmosine	C18H34N4O6	0.646618	1.309e-12	5.0784	5.0645	5.0752	5.0697	5.0728	5.0632	3.3808	3.1563	3.2247	3.1824	3.3841	3.3486	Carboxylic acids and derivatives	Amino acids, peptides, and analogues	Organic acids and derivatives
Threoninyl-Glutamine	C9H17N3O5	0.880852	2.111e-14	5.451	5.4417	5.4443	5.4512	5.441	5.4534	4.8289	4.7834	4.8154	4.8001	4.7599	4.802	Carboxylic acids and derivatives	Amino acids, peptides, and analogues	Organic acids and derivatives
(Z)-3-Oxo-2-(2-pentenyl)-1-cyclopenteneacetic acid	C12H16O3	0.773068	4.453e-13	4.9446	4.9423	4.9085	4.9347	4.9247	4.9298	3.819	3.8892	3.7511	3.7622	3.7832	3.8668	Organooxygen compounds	Carbonyl compounds	Organic oxygen compounds
Tanacetol A	C17H26O4	0.765999	6.26e-09	3.5345	3.7496	3.6133	3.4736	3.6506	3.5415	2.7289	2.7368	2.7251	2.8732	2.7269	2.7255	Prenol lipids	Sesquiterpenoids	Lipids and lipid-like molecules
(9Z,11R,12S,13S,15Z)-12,13-Epoxy-11-hydroxy-9,15-octadecadienoic acid	C18H30O4	0.862708	1.492e-07	4.6952	4.6716	4.6964	4.71	4.6989	4.7151	4.0658	4.1057	4.1609	3.9957	3.8382	4.1526	Fatty Acyls	Fatty acids and conjugates	Lipids and lipid-like molecules
Ginsenoside Mc	C41H70O12	0.886412	3.486e-12	6.047	6.0633	6.0502	6.039	6.0718	6.0689	5.3381	5.4107	5.3319	5.4302	5.3381	5.3676	Prenol lipids	Terpene glycosides	Lipids and lipid-like molecules
Muricatenol	C37H68O6	0.855574	2.654e-12	5.3623	5.3447	5.4021	5.3754	5.3677	5.3852	4.6472	4.5674	4.6286	4.6294	4.5366	4.5726	Fatty Acyls	Fatty alcohols	Lipids and lipid-like molecules
CPA(18:1(11Z)/0:0)	C21H39O6P	0.771783	0.0001671	4.7459	4.7678	3.8903	4.1065	4.4251	4.645	3.3311	3.3271	3.3273	3.3238	3.329	3.8736	Glycerophospholipids	Glycerophosphates	Lipids and lipid-like molecules
Cerebroside B	C41H77NO9	0.822552	3.484e-06	5.0848	4.9961	5.0611	5.0603	5.0094	5.1182	4.0413	4.4465	3.9093	4.3664	3.9111	4.2732	Sphingolipids	Glycosphingolipids	Lipids and lipid-like molecules
3'-Hydroxystanozolol	C21H32N2O2	0.792884	5.674e-13	5.1009	5.055	5.03	4.9948	5.0613	4.9434	3.9921	3.9882	3.9883	3.9849	3.99	3.9886	Steroids and steroid derivatives	Estrane steroids	Lipids and lipid-like molecules
Squamocin L	C37H66O6	0.889397	6.81e-06	4.9477	5.0754	5.0469	4.9185	5.1282	5.0458	4.5391	4.6384	4.3943	4.4425	4.5632	4.2505	Fatty Acyls	Fatty alcohols	Lipids and lipid-like molecules
9-OxoODE	C18H30O3	0.896789	2.902e-14	5.8348	5.8173	5.8281	5.8257	5.8182	5.8139	5.2485	5.1807	5.2215	5.2267	5.2207	5.231	Fatty Acyls	Lineolic acids and derivatives	Lipids and lipid-like molecules
9(S)-HPODE	C18H32O4	0.884622	1.202e-14	5.5021	5.497	5.4971	5.4927	5.5018	5.4789	4.8659	4.8361	4.8621	4.8984	4.8466	4.8593	Fatty Acyls	Lineolic acids and derivatives	Lipids and lipid-like molecules
Mollicellin A	C21H18O7	0.811534	3.895e-10	4.639	4.5971	4.5931	4.5976	4.5588	4.5868	3.813	3.7257	3.65	3.6119	3.7464	3.8246	Prenol lipids	Sesterterpenoids	Lipids and lipid-like molecules
Arginyl-Asparagine	C10H20N6O4	0.799186	1.839e-10	4.6877	4.6741	4.6558	4.6557	4.6686	4.6514	3.6054	3.7965	3.7235	3.8259	3.7801	3.6453	Carboxylic acids and derivatives	Amino acids, peptides, and analogues	Organic acids and derivatives
Dynorphin A (6-8)	C18H37N9O4	0.65365	2.691e-11	4.9016	4.8767	4.9067	4.8869	4.904	4.8698	3.3366	3.302	3.2836	2.9999	3.1553	3.104	Carboxylic acids and derivatives	Amino acids, peptides, and analogues	Organic acids and derivatives
2-Amino-4-ethoxy-3-hydroxybutanoic acid	C6H13NO4	0.838723	4.718e-12	4.7695	4.781	4.7563	4.7523	4.7428	4.7707	4.0651	4.0105	3.9176	4.0103	3.9848	3.977	Carboxylic acids and derivatives	Amino acids, peptides, and analogues	Organic acids and derivatives
Lysyl-Phenylalanine	C15H23N3O3	0.8328	1.693e-14	5.3225	5.3072	5.3134	5.3107	5.3049	5.3073	4.4489	4.4142	4.4136	4.3713	4.4229	4.4656	Carboxylic acids and derivatives	Amino acids, peptides, and analogues	Organic acids and derivatives
Jasmolone glucoside	C17H26O7	0.771317	3.773e-14	4.6305	4.6174	4.6065	4.6097	4.5909	4.6005	3.5945	3.5967	3.4975	3.5543	3.5176	3.5691	Organooxygen compounds	Carbohydrates and carbohydrate conjugates	Organic oxygen compounds
Tetradecanedioic acid	C14H26O4	0.760943	3.367e-19	5.0754	5.0331	5.0582	5.0425	5.0422	5.0447	3.8456	3.8417	3.8419	3.8384	3.8436	3.8422	Fatty Acyls	Fatty acids and conjugates	Lipids and lipid-like molecules
Pentosidine	C17H26N6O4	0.636012	4.096e-20	4.6808	4.6363	4.6664	4.6437	4.6403	4.6537	2.9633	2.9594	2.9596	2.9561	2.9613	2.9599	Carboxylic acids and derivatives	Amino acids, peptides, and analogues	Organic acids and derivatives
Hydroxyprolyl-Alanine	C8H14N2O4	0.830964	3.907e-15	5.2299	5.2021	5.2115	5.2018	5.1939	5.1971	4.3446	4.3302	4.3369	4.3328	4.3335	4.2749	Carboxylic acids and derivatives	Amino acids, peptides, and analogues	Organic acids and derivatives
1-(beta-D-Glucopyranosyloxy)-3-octanone	C14H26O7	0.74726	7.751e-14	4.6597	4.6575	4.6438	4.6562	4.6407	4.6631	3.4827	3.5519	3.4698	3.4896	3.4765	3.3941	Fatty Acyls	Fatty acyl glycosides	Lipids and lipid-like molecules
8,20-DiHETE	C20H32O4	0.884554	5.853e-17	5.6186	5.6131	5.616	5.6107	5.6171	5.6045	4.9712	4.9583	4.9737	4.9497	4.9557	4.9833	Fatty Acyls	Eicosanoids	Lipids and lipid-like molecules
Undecanedioic acid	C11H20O4	0.785337	1.095e-10	4.3536	4.3466	4.3721	4.3455	4.3458	4.344	3.3527	3.5274	3.4548	3.4298	3.4475	3.2893	Fatty Acyls	Fatty acids and conjugates	Lipids and lipid-like molecules
Lotaustralin	C11H19NO6	0.871619	3.413e-15	4.9583	4.9567	4.944	4.96	4.9507	4.9552	4.3497	4.3216	4.2988	4.2959	4.3213	4.319	Organooxygen compounds	Carbohydrates and carbohydrate conjugates	Organic oxygen compounds
5-Acetyl-2,4-dimethyloxazole	C7H9NO2	0.884834	3.886e-18	5.4606	5.4484	5.451	5.4551	5.4446	5.4568	4.835	4.8213	4.8271	4.8325	4.8133	4.8192	Azoles	Oxazoles	Organoheterocyclic compounds
Lysyl-Threonine	C10H21N3O4	0.647699	4.325e-16	5.1554	5.1375	5.1553	5.1417	5.1591	5.148	3.3235	3.3125	3.3782	3.2849	3.4046	3.3061	Carboxylic acids and derivatives	Amino acids, peptides, and analogues	Organic acids and derivatives
Osmundalactone	C6H8O3	0.827407	3.627e-21	6.1614	6.1506	6.163	6.1574	6.16	6.1619	5.1	5.1	5.104	5.0845	5.0903	5.0944	Pyrans	Pyranones and derivatives	Organoheterocyclic compounds
4-O-Methylgalactinol	C13H24O11	0.639869	2.316e-15	5.7955	5.789	5.7914	5.766	5.784	5.7799	3.697	3.6538	3.7764	3.645	3.6508	3.7803	Organooxygen compounds	Carbohydrates and carbohydrate conjugates	Organic oxygen compounds
Isokobusone	C14H22O2	0.870032	6.18e-18	5.8638	5.8616	5.8682	5.8515	5.8658	5.8678	5.0998	5.0913	5.1015	5.0855	5.1145	5.1121	Organooxygen compounds	Alcohols and polyols	Organic oxygen compounds
Threoninyl-Phenylalanine	C13H18N2O4	0.61255	8.076e-11	4.749	4.7567	4.7695	4.7451	4.7315	4.7449	3.0521	2.8361	3.1137	2.7397	2.7384	2.9732	Carboxylic acids and derivatives	Amino acids, peptides, and analogues	Organic acids and derivatives
N5-Acetyl-N2-gamma-L-glutamyl-L-ornithine	C12H21N3O6	0.74347	4.093e-12	4.969	4.9226	4.9485	4.9362	4.9162	4.9445	3.5249	3.7466	3.6733	3.682	3.7406	3.6674	Carboxylic acids and derivatives	Amino acids, peptides, and analogues	Organic acids and derivatives
D-Pipecolic acid	C6H11NO2	0.901332	4.66e-16	6.084	6.0544	6.0876	6.0886	6.0829	6.0907	5.4909	5.4867	5.4853	5.4776	5.4726	5.4718	Carboxylic acids and derivatives	Amino acids, peptides, and analogues	Organic acids and derivatives
Glycerophosphocholine	C8H20NO6P	0.845023	2.212e-16	5.9093	5.9207	5.91	5.9383	5.9169	5.9062	4.9769	5.019	5.0226	4.9925	5.0052	4.983	Glycerophospholipids	Glycerophosphocholines	Lipids and lipid-like molecules
Lysyl-Valine	C11H23N3O3	0.909856	1.766e-16	6.064	6.049	6.0519	6.0645	6.0641	6.0462	5.5183	5.5019	5.522	5.5157	5.497	5.5096	Carboxylic acids and derivatives	Amino acids, peptides, and analogues	Organic acids and derivatives
Lysinoalanine	C9H19N3O4	0.871346	5.323e-18	5.7198	5.7015	5.7058	5.719	5.717	5.717	4.992	4.983	4.9775	4.979	4.9642	4.9714	Carboxylic acids and derivatives	Amino acids, peptides, and analogues	Organic acids and derivatives

## Sheet: ZD_2 vs ZD_1 up-regulated
Metabolite	Formula	FC(ZD2/ZD1)	P_value	ZD1_1	ZD1_2	ZD1_3	ZD1_4	ZD1_5	ZD1_6	ZD2_1	ZD2_2	ZD2_3	ZD2_4	ZD2_5	ZD2_6	HMDB Subclass	subclass	HMDB Superclass
Gamma-Glutamylvaline	C10H18N2O5	1.15925	1.11e-17	4.7442	4.7257	4.7512	4.7401	4.7441	4.7403	5.4801	5.4884	5.5025	5.4915	5.5025	5.5081	Carboxylic acids and derivatives	Amino acids, peptides, and analogues	Organic acids and derivatives
Stachyose	C24H42O21	1.40666	8.889e-12	4.4438	4.492	4.5588	4.5408	4.431	4.2097	6.261	6.2501	6.2585	6.2313	6.2623	6.263	Organooxygen compounds	Carbohydrates and carbohydrate conjugates	Organic oxygen compounds
Glucosamine 6-sulfate	C6H13NO8S	1.21257	2.364e-10	3.7474	3.7491	3.6537	3.8461	3.7946	3.7333	4.5551	4.5637	4.6092	4.5481	4.5639	4.4731	Organooxygen compounds	Carbohydrates and carbohydrate conjugates	Organic oxygen compounds
Pseudooxynicotine	C10H14N2O	1.2476	9.434e-19	3.9667	3.9673	3.9819	3.9569	3.956	3.9681	4.9523	4.9349	4.9549	4.9358	4.9542	4.9571	Organooxygen compounds	Carbonyl compounds	Organic oxygen compounds
4,5-Dihydroniveusin A	C20H28O8	1.10061	3.711e-16	4.9399	4.9351	4.919	4.9272	4.9431	4.9178	5.4361	5.4207	5.4245	5.4254	5.433	5.4191	Prenol lipids	Terpene lactones	Lipids and lipid-like molecules
6-Gingesulfonic acid	C17H26O6S	1.18345	5.686e-15	3.8441	3.8382	3.8774	3.8209	3.8544	3.8222	4.5353	4.5447	4.5444	4.5665	4.5469	4.5516	Phenols	Methoxyphenols	Benzenoids
6-(2-carboxy-2-methylethoxy)-3,4,5-trihydroxyoxane-2-carboxylic acid	C10H16O9	1.12248	3.354e-15	4.7127	4.6855	4.6991	4.7352	4.7192	4.7142	5.2832	5.2979	5.2899	5.2904	5.2906	5.2781	Organooxygen compounds	Carbohydrates and carbohydrate conjugates	Organic oxygen compounds
()-3-Hydroxynonanoic acid	C9H18O3	1.4224	3.775e-12	2.7247	2.5651	2.6668	2.767	2.6643	2.7311	3.8351	3.8197	3.8047	3.8132	3.8143	3.8466	Hydroxy acids and derivatives	Medium-chain hydroxy acids and derivatives	Organic acids and derivatives
Undecanoic acid	C11H22O2	1.40366	3.37e-14	2.8187	2.7439	2.8442	2.7723	2.7994	2.7452	3.9234	3.9267	3.8731	3.9173	3.9132	3.9171	Fatty Acyls	Fatty acids and conjugates	Lipids and lipid-like molecules
(3b,4b,11b,14b)-11-Ethoxy-3,4-epoxy-14-hydroxy-12-cyathen-15-al 14-xyloside	C27H42O8	1.92699	2.207e-23	2.6135	2.6101	2.6176	2.615	2.6184	2.621	5.0436	5.0349	5.0468	5.0271	5.0587	5.0358	Prenol lipids	Diterpenoids	Lipids and lipid-like molecules
Kudzusaponin SA4	C47H74O20	1.17246	4.378e-11	4.7158	4.7399	4.6976	4.8266	4.7012	4.6397	5.4868	5.5535	5.5571	5.5498	5.533	5.5256	Prenol lipids	Terpene glycosides	Lipids and lipid-like molecules
4-Hydroxy-8-methoxy-2H-furo[2,3-h]-1-benzopyran-2-one	C12H8O5	1.51587	7.922e-14	2.9268	2.9346	2.8088	2.8663	2.7845	2.8784	4.3039	4.3569	4.3641	4.3497	4.341	4.3597	Coumarins and derivatives	Furanocoumarins	Phenylpropanoids and polyketides
Heptyl 4-hydroxybenzoate	C14H20O3	1.15519	4.987e-11	3.3239	3.3176	3.334	3.2697	3.3531	3.2728	3.7864	3.8145	3.848	3.8198	3.8224	3.8623	Benzene and substituted derivatives	Benzoic acids and derivatives	Benzenoids
Valyl-Valine	C10H20N2O3	1.2337	1.455e-18	4.255	4.2411	4.2578	4.2312	4.2548	4.2567	5.247	5.2259	5.2551	5.2397	5.2406	5.246	Carboxylic acids and derivatives	Amino acids, peptides, and analogues	Organic acids and derivatives
2-[(sulfooxy)methyl]butanoic acid	C5H10O6S	1.22179	1.66e-17	3.5492	3.5658	3.561	3.5545	3.5566	3.5835	4.3431	4.3459	4.3443	4.3609	4.3607	4.358	Fatty Acyls	Fatty acids and conjugates	Lipids and lipid-like molecules
N-gamma-Glutamyl-S-allylcysteine	C11H18N2O5S	1.13619	1.282e-12	3.7001	3.7357	3.6692	3.718	3.7297	3.6981	4.189	4.2113	4.2343	4.2196	4.203	4.2218	Carboxylic acids and derivatives	Amino acids, peptides, and analogues	Organic acids and derivatives
Xanthine	C5H4N4O2	1.29487	5.621e-16	3.133	3.1147	3.1454	3.114	3.1362	3.1764	4.0531	4.0553	4.0711	4.0589	4.0746	4.0616	Imidazopyrimidines	Purines and purine derivatives	Organoheterocyclic compounds
Prolyl-Cysteine	C8H14N2O3S	1.18782	3.904e-16	4.0801	4.1041	4.1391	4.1009	4.0974	4.1067	4.8746	4.8746	4.8826	4.8792	4.8696	4.8781	Carboxylic acids and derivatives	Amino acids, peptides, and analogues	Organic acids and derivatives
L-Fucose	C6H12O5	1.22211	1.121e-18	4.041	4.0376	4.0451	4.0426	4.046	4.0485	4.9329	4.9438	4.9577	4.9511	4.9257	4.9334	Organooxygen compounds	Carbohydrates and carbohydrate conjugates	Organic oxygen compounds
Gypsogenin 3-O-b-D-glucuronide	C36H54O10	1.18095	2.003e-13	4.5124	4.5293	4.4739	4.5492	4.5479	4.4749	5.3114	5.3515	5.3065	5.3433	5.3503	5.3291	Prenol lipids	Terpene glycosides	Lipids and lipid-like molecules
Beta-Elemolic acid	C30H48O3	1.19735	4.918e-13	4.2651	4.3305	4.2942	4.2965	4.3549	4.2388	5.1545	5.1219	5.1586	5.1435	5.1551	5.1348	Prenol lipids	Triterpenoids	Lipids and lipid-like molecules
Lusitanicoside	C21H30O10	1.13523	9.21e-14	4.4487	4.3905	4.4279	4.443	4.3963	4.4265	5.0181	5.0158	5.0108	5.0101	5.0406	5.0252	Organooxygen compounds	Carbohydrates and carbohydrate conjugates	Organic oxygen compounds
Pterosin E	C14H16O3	1.11843	2.923e-15	4.211	4.1952	4.1866	4.2246	4.2105	4.2013	4.7004	4.718	4.6968	4.7044	4.6967	4.6994	Indanes	Indanones	Benzenoids
Hypoxanthine	C5H4N4O	1.19882	7.605e-18	4.3826	4.3907	4.4087	4.3989	4.381	4.4133	5.2687	5.272	5.2567	5.2753	5.2693	5.2756	Imidazopyrimidines	Purines and purine derivatives	Organoheterocyclic compounds
Bisnorbiotin	C8H12N2O3S	1.2891	8.453e-20	4.3113	4.3186	4.3215	4.3048	4.3049	4.299	5.5449	5.5443	5.5542	5.5564	5.5721	5.5623	Carboxylic acids and derivatives	Amino acids, peptides, and analogues	Organic acids and derivatives
2-S-glutathionyl acetate	C12H19N3O8S	1.78006	9.755e-11	2.4077	2.7306	2.7866	2.4793	2.4087	2.4069	4.4848	4.4949	4.528	4.5125	4.5607	4.5175	Carboxylic acids and derivatives	Amino acids, peptides, and analogues	Organic acids and derivatives
4'-Methylliquiritigenin 7-rhamnoside	C22H24O8	2.01156	2.619e-11	2.6375	2.1869	2.3577	2.1883	2.4489	2.1897	4.6734	4.6805	4.6992	4.699	4.7104	4.7175	Flavonoids	Flavonoid glycosides	Phenylpropanoids and polyketides
Hydroxydesmthyl doxepin glucuronide	C25H29NO8	2.01631	3.796e-07	1.5343	1.5308	1.5297	1.5321	1.5353	1.5335	3.031	3.4323	3.4421	2.6713	2.7691	3.1995	Benzoxepines	Dibenzoxepines	Organoheterocyclic compounds
Threoninyl-Glutamine	C9H17N3O5	1.17541	4.826e-11	4.1272	4.1302	4.0988	4.13	4.1226	3.9866	4.7925	4.8035	4.8383	4.8052	4.8313	4.8382	Carboxylic acids and derivatives	Amino acids, peptides, and analogues	Organic acids and derivatives
Methyl 2-hydroxy-3-(4-hydroxy-3-methoxyphenyl)propanoate	C11H14O5	1.12191	4.828e-14	4.192	4.1711	4.1477	4.1415	4.1713	4.1764	4.6746	4.671	4.6658	4.6733	4.694	4.6738	Phenols	Methoxyphenols	Benzenoids
(Z)-3-Oxo-2-(2-pentenyl)-1-cyclopenteneacetic acid	C12H16O3	1.13659	9.873e-14	4.3749	4.34	4.3892	4.3514	4.3653	4.3165	4.9588	4.9458	4.9553	4.9523	4.9524	4.9441	Organooxygen compounds	Carbonyl compounds	Organic oxygen compounds
Alpha-Terpineol propanoate	C13H22O2	1.11714	6.668e-11	4.3435	4.2958	4.2906	4.32	4.2864	4.2264	4.8126	4.7791	4.7942	4.7815	4.7908	4.8246	Prenol lipids	Monoterpenoids	Lipids and lipid-like molecules
22-Angeloylbarringtogenol C	C35H56O6	1.18668	2.207e-07	3.8213	3.6893	3.6883	3.6907	3.9014	3.7385	4.4971	4.5116	4.5028	4.324	4.3214	4.5782	Prenol lipids	Triterpenoids	Lipids and lipid-like molecules
1-(11Z,14Z-eicosadienoyl)-glycero-3-phosphate	C23H43O7P	1.11628	4.666e-14	4.6892	4.6856	4.6845	4.687	4.6902	4.6884	5.2585	5.2507	5.2106	5.213	5.2489	5.2127	Glycerophospholipids	Glycerophosphates	Lipids and lipid-like molecules
Vitamin D2 3-glucuronide	C34H52O7	1.10575	2.908e-06	4.8226	4.7185	4.8064	4.5693	4.6358	4.535	5.1291	5.185	5.1548	5.1298	5.2438	5.2108	Steroids and steroid derivatives	Vitamin D and derivatives	Lipids and lipid-like molecules
Dehydrovomifoliol	C13H18O3	1.13771	1.15e-11	3.6432	3.6445	3.5897	3.6932	3.6363	3.6183	4.1441	4.1351	4.143	4.1163	4.1464	4.1463	Prenol lipids	Sesquiterpenoids	Lipids and lipid-like molecules
N-(1-Deoxy-1-fructosyl)glycine	C8H15NO7	1.32263	2.037e-13	3.4896	3.525	3.5466	3.5707	3.5246	3.6403	4.6757	4.6827	4.678	4.7062	4.7206	4.6995	Organooxygen compounds	Carbohydrates and carbohydrate conjugates	Organic oxygen compounds
N-(1-Deoxy-1-fructosyl)valine	C11H21NO7	1.18505	4.98e-20	5.0487	5.0464	5.0272	5.0472	5.0454	5.0382	5.9739	5.9777	5.9802	5.9773	5.9771	5.9653	Carboxylic acids and derivatives	Amino acids, peptides, and analogues	Organic acids and derivatives
Syringic acid	C9H10O5	1.11988	2.299e-15	3.9703	3.971	3.9727	3.9914	3.986	3.98	4.4502	4.4567	4.4383	4.4736	4.4569	4.4616	Benzene and substituted derivatives	Benzoic acids and derivatives	Benzenoids
(S)-2,3-Dihydro-3,5-dihydroxy-2-oxo-3-indoleacetic acid 5-glucoside	C16H19NO10	1.13678	1.806e-15	4.8289	4.8515	4.8243	4.8505	4.8489	4.8371	5.4873	5.4864	5.5174	5.489	5.5196	5.5114	Organooxygen compounds	Carbohydrates and carbohydrate conjugates	Organic oxygen compounds
L-Valine	C5H11NO2	1.0803	3.778e-21	5.6035	5.6049	5.6028	5.6004	5.6065	5.6047	6.0489	6.0564	6.0565	6.0528	6.055	6.0517	Carboxylic acids and derivatives	Amino acids, peptides, and analogues	Organic acids and derivatives
Methyl helianthenoate A glucoside	C19H24O8	1.13754	2.045e-11	4.8674	4.8967	4.9805	4.9684	4.9653	4.9855	5.6108	5.6344	5.6235	5.6003	5.6293	5.6441	Fatty Acyls	Fatty acyl glycosides	Lipids and lipid-like molecules

## Sheet: ZD_2 vs ZD_1 down-regulated
Metabolite	Formula	FC(ZD2/ZD1)	P_value	ZD1_1	ZD1_2	ZD1_3	ZD1_4	ZD1_5	ZD1_6	ZD2_1	ZD2_2	ZD2_3	ZD2_4	ZD2_5	ZD2_6	HMDB Subclass	Class	HMDB Superclass
Cynaratriol	C15H22O5	0.821832	3.877e-21	5.7528	5.7436	5.7454	5.7603	5.7575	5.7566	4.729	4.7341	4.7282	4.7231	4.7326	4.7224	Prenol lipids	Terpene lactones	Lipids and lipid-like molecules
Alanyl-Hydroxyproline	C8H14N2O4	0.820362	1.633e-11	3.9135	3.9045	3.9299	3.9101	3.9364	3.9196	3.2245	3.2501	3.227	3.1121	3.2314	3.2427	Carboxylic acids and derivatives	Amino acids, peptides, and analogues	Organic acids and derivatives
LysoPC(18:2(9Z,12Z))	C26H50NO7P	0.902568	1.086e-16	5.8463	5.8299	5.8498	5.8361	5.8393	5.8371	5.2729	5.2658	5.277	5.2821	5.2744	5.2519	Glycerophospholipids	Glycerophosphocholines	Lipids and lipid-like molecules
LysoPC(15:0)	C23H48NO7P	0.840279	2.923e-14	5.1576	5.1464	5.1704	5.176	5.1662	5.1391	4.3851	4.3451	4.3377	4.3311	4.3097	4.3033	Glycerophospholipids	Glycerophosphocholines	Lipids and lipid-like molecules
Prostaglandin G2 2-glyceryl Ester	C23H38O8	0.906484	2.77e-11	4.9583	4.9493	4.9429	4.9583	4.9529	4.9463	4.5432	4.5149	4.4662	4.4907	4.4673	4.4459	Fatty Acyls	Eicosanoids	Lipids and lipid-like molecules
Soyasaponin A3	C48H78O19	0.908881	8.504e-12	4.7617	4.7723	4.7729	4.7519	4.7752	4.7449	4.3706	4.2899	4.3135	4.334	4.3232	4.3451	Benzene and substituted derivatives	Benzoic acids and derivatives	Benzenoids
Canavalioside	C26H42O12	0.837653	7.658e-13	4.3924	4.4177	4.4031	4.3824	4.4023	4.3879	3.7085	3.7036	3.6912	3.6118	3.6833	3.7083	Prenol lipids	Terpene glycosides	Lipids and lipid-like molecules
Dihydrocarveol acetate	C12H20O2	0.743494	4.44e-16	4.2961	4.2994	4.2987	4.3175	4.3085	4.3059	3.1816	3.1784	3.2002	3.1725	3.2377	3.2287	Prenol lipids	Monoterpenoids	Lipids and lipid-like molecules
7,8-Dihydrovomifoliol 9-[apiosyl-(1->6)-glucoside]	C24H40O12	0.765508	1.063e-07	3.2644	3.093	3.0657	3.1679	2.8851	2.9994	2.3487	2.3483	2.3496	2.3592	2.3877	2.3468	Fatty Acyls	Fatty acyl glycosides	Lipids and lipid-like molecules
5-(3',4',5'-trihydroxyphenyl)-gamma-valerolactone-O-methyl-4'-O-glucuronide	C18H22O11	0.836725	6.864e-09	4.4252	4.4336	4.4158	4.4122	4.4374	4.4104	3.7425	3.5584	3.6624	3.6319	3.8106	3.7943	Organooxygen compounds	Carbohydrates and carbohydrate conjugates	Organic oxygen compounds
2-amino-6-hydroxyhexanoic acid	C6H13NO3	0.919162	1.748e-15	6.4341	6.4353	6.4414	6.4445	6.4553	6.4623	5.9178	5.9296	5.9372	5.9158	5.9321	5.9096	Carboxylic acids and derivatives	Amino acids, peptides, and analogues	Organic acids and derivatives
Feruloyl C1-glucuronide	C16H18O10	0.800734	2.059e-15	4.8976	4.8875	4.9174	4.9041	4.8866	4.9224	3.9188	3.9245	3.8922	3.9482	3.911	3.9626	Isoflavonoids	Isoflavonoid O-glycosides	Phenylpropanoids and polyketides
LysoPC(0:0/18:0)	C26H54NO7P	0.776716	2.73e-07	5.0833	4.9894	5.0858	5.0552	4.9696	4.967	3.7066	4.055	4.1235	3.5584	3.9913	3.9814	Glycerophospholipids	Glycerophosphocholines	Lipids and lipid-like molecules
3',6-Disinapoylsucrose	C34H42O19	0.901137	1.438e-12	5.7302	5.7077	5.7285	5.7171	5.7133	5.695	5.1285	5.1658	5.1339	5.1246	5.1428	5.2041	Cinnamic acids and derivatives	Hydroxycinnamic acids and derivatives	Phenylpropanoids and polyketides
Medicanine	C7H13NO3	0.855596	1.103e-14	5.8102	5.8175	5.8278	5.808	5.8261	5.8145	4.923	5.0091	4.9734	4.9806	4.9881	4.9876	Carboxylic acids and derivatives	Amino acids, peptides, and analogues	Organic acids and derivatives
Oryzalide B	C19H28O4	0.9	1.853e-14	5.3618	5.338	5.3471	5.357	5.3363	5.3598	4.8193	4.8147	4.787	4.8329	4.805	4.8291	Prenol lipids	Terpene lactones	Lipids and lipid-like molecules
Acoric acid	C15H24O4	0.719374	4.329e-08	3.5153	3.3911	3.4375	3.4596	3.418	3.4936	2.4044	2.798	2.405	2.4435	2.4388	2.412	Prenol lipids	Monoterpenoids	Lipids and lipid-like molecules
3,4,5-trihydroxy-6-[(2-oxo-3-phenylpropanoyl)oxy]oxane-2-carboxylic acid	C15H16O9	0.684127	3.707e-17	3.7578	3.7693	3.7777	3.7193	3.7557	3.7886	2.5737	2.5738	2.5744	2.5721	2.5762	2.5707	Organooxygen compounds	Carbohydrates and carbohydrate conjugates	Organic oxygen compounds
Tanacetol A	C17H26O4	0.718575	2.829e-06	4.3543	4.2631	4.1775	4.1039	3.9759	3.7058	2.7358	3.0178	2.7787	3.0894	2.8291	3.2154	Prenol lipids	Sesquiterpenoids	Lipids and lipid-like molecules
2-Methyl-4-propyloxazole	C7H11NO	0.917131	1.546e-14	5.3647	5.3944	5.3706	5.3887	5.3864	5.3855	4.9493	4.9253	4.9514	4.9244	4.9373	4.93	Azoles	Oxazoles	Organoheterocyclic compounds
(9Z,11R,12S,13S,15Z)-12,13-Epoxy-11-hydroxy-9,15-octadecadienoic acid	C18H30O4	0.855872	2.07e-12	4.9488	4.9335	4.9244	4.9641	4.9695	4.9405	4.2132	4.2623	4.297	4.2329	4.1908	4.2069	Fatty Acyls	Fatty acids and conjugates	Lipids and lipid-like molecules
PS(16:1(9Z)/20:1(11Z))	C42H78NO10P	0.873371	8.042e-10	5.3322	5.3366	5.3015	5.4386	5.406	5.4034	4.678	4.6192	4.6384	4.7468	4.7321	4.7245	Glycerophospholipids	Glycerophosphoserines	Lipids and lipid-like molecules
CPA(18:1(11Z)/0:0)	C21H39O6P	0.827807	0.0004256	4.9804	5.0097	5.098	5.0101	4.9863	4.9515	4.4467	4.3338	4.1948	3.3364	4.3424	4.2071	Glycerophospholipids	Glycerophosphates	Lipids and lipid-like molecules
Cerebroside B	C41H77NO9	0.847384	5.088e-10	4.5804	4.6753	4.4982	4.6873	4.63	4.683	3.92	3.92	3.9206	3.9184	3.9225	3.917	Sphingolipids	Glycosphingolipids	Lipids and lipid-like molecules
Squamotacin	C37H66O7	0.893549	4.436e-06	5.0298	5.0814	4.9445	4.9285	5.0038	5.0521	4.5686	4.5823	4.2966	4.4607	4.6034	4.3351	Fatty Acyls	Fatty alcohols	Lipids and lipid-like molecules
Dynorphin A (6-8)	C18H37N9O4	0.878868	6.183e-11	4.929	4.9568	4.9537	4.9484	4.9254	4.9592	4.3196	4.3699	4.3458	4.3564	4.4152	4.2694	Carboxylic acids and derivatives	Amino acids, peptides, and analogues	Organic acids and derivatives
2-Amino-4-ethoxy-3-hydroxybutanoic acid	C6H13NO4	0.829732	1.981e-11	4.2809	4.2298	4.3045	4.2501	4.276	4.2069	3.5107	3.5732	3.5258	3.5795	3.5394	3.4666	Carboxylic acids and derivatives	Amino acids, peptides, and analogues	Organic acids and derivatives
Lysyl-Phenylalanine	C15H23N3O3	0.872841	5.02e-16	5.1042	5.1048	5.0869	5.101	5.0984	5.0787	4.439	4.4296	4.4522	4.4432	4.4638	4.4617	Carboxylic acids and derivatives	Amino acids, peptides, and analogues	Organic acids and derivatives
Jasmolone glucoside	C17H26O7	0.611248	5.54e-17	4.0742	4.0611	4.0439	4.032	4.1031	4.0096	2.4766	2.4868	2.4772	2.475	2.4791	2.4736	Organooxygen compounds	Carbohydrates and carbohydrate conjugates	Organic oxygen compounds
Hydroxyprolyl-Alanine	C8H14N2O4	0.810505	2.854e-13	4.9662	4.96	4.9295	4.9551	4.9437	4.9438	4.0559	3.9494	4.0111	4.017	4.0638	3.9744	Carboxylic acids and derivatives	Amino acids, peptides, and analogues	Organic acids and derivatives
1-(beta-D-Glucopyranosyloxy)-3-octanone	C14H26O7	0.871085	9.921e-06	3.5922	3.5321	3.6641	3.5691	3.5887	3.5095	2.944	3.1836	2.9838	3.2315	3.243	3.103	Fatty Acyls	Fatty acyl glycosides	Lipids and lipid-like molecules
Lysyl-Threonine	C10H21N3O4	0.879714	2.609e-11	4.1943	4.201	4.1433	4.1982	4.2062	4.1961	3.7113	3.6604	3.6733	3.6871	3.7338	3.6493	Carboxylic acids and derivatives	Amino acids, peptides, and analogues	Organic acids and derivatives
